# Supplementary material
Source: publisher figshare collection journal article supplement (https://acs.figshare.com/ndownloader/files/11511221)
Supplement: Supplementary file 1 [file 11511221]

# **Reduction and Reductive Deuteration of Tertiary Amides Mediated by Sodium Dispersions with Distinct Proton Donor-Dependent Chemoselectivity**

Bin Zhang, Hengzhao Li, Yuxuan Ding, Yuhao Yan and Jie An\*

College of Science, China Agricultural University, No.2 Yuanmingyuan West Road, Beijing 100193, China.

\*jie\_an@cau.edu.cn

## **Supplementary Information**

**<sup>1</sup>H and <sup>13</sup>C NMR Spectra** **S2**

**Photos of Sodium Dispersions and Reaction** **S32**

# <sup>1</sup>H and <sup>13</sup>C NMR Spectra

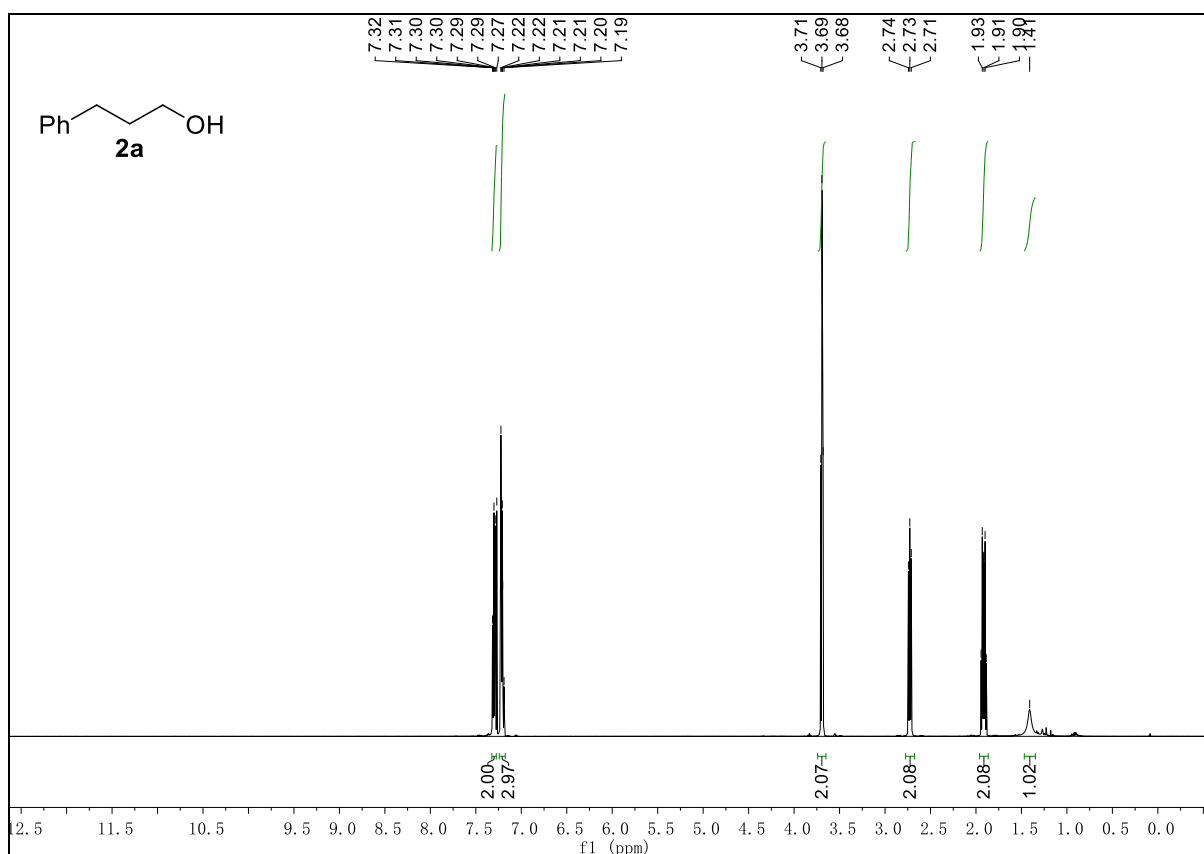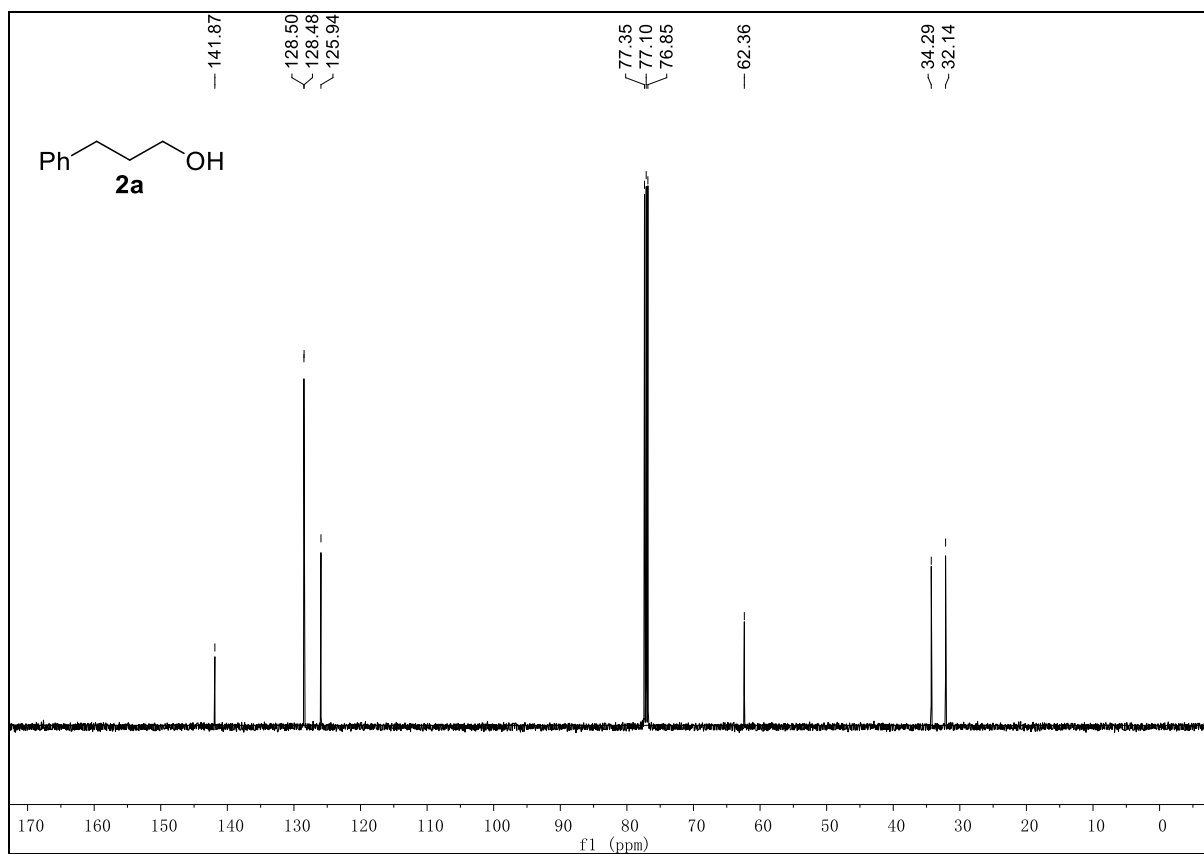

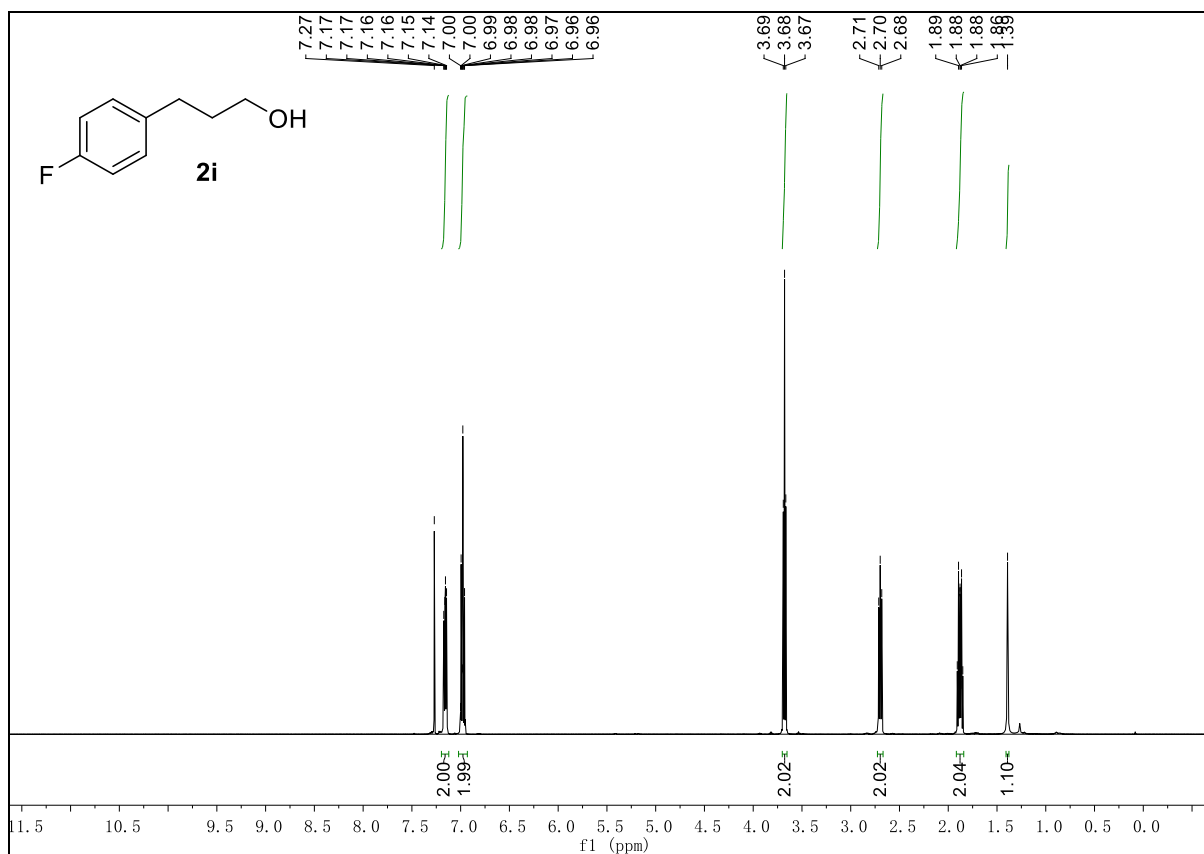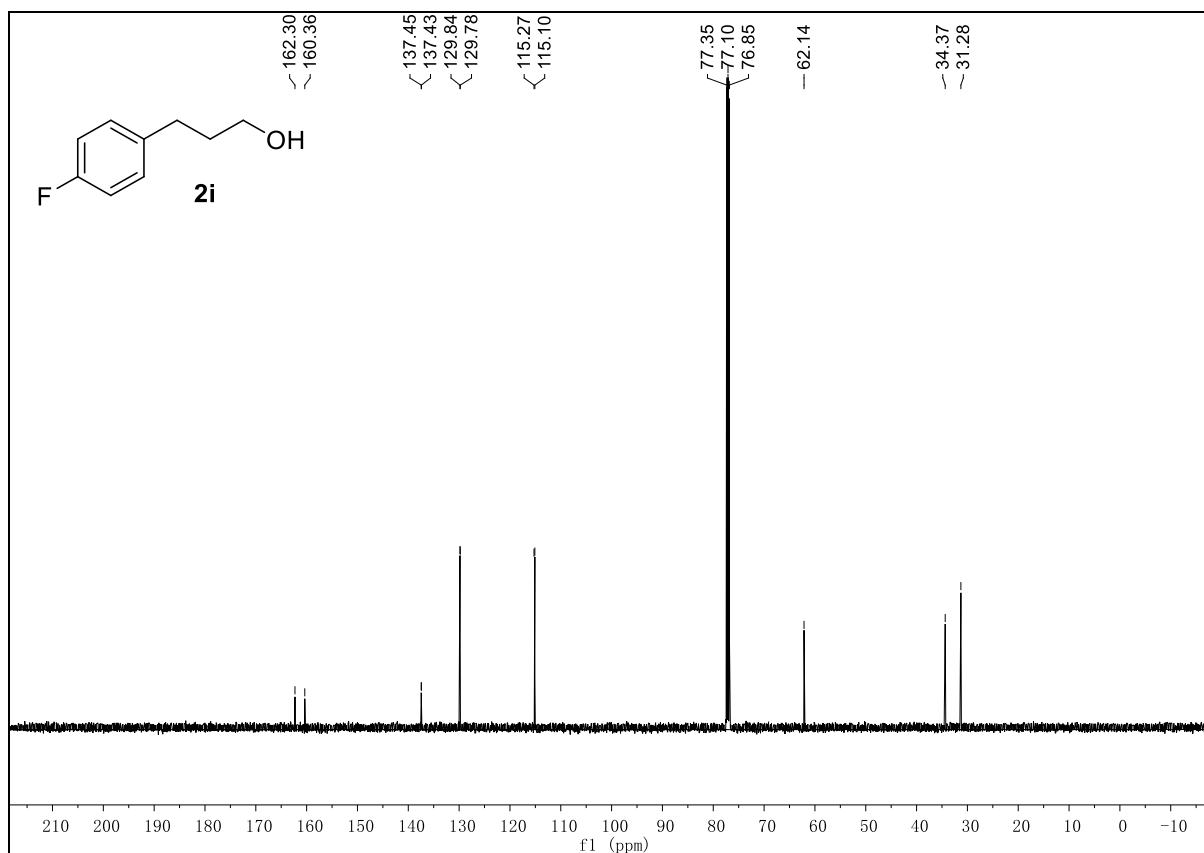

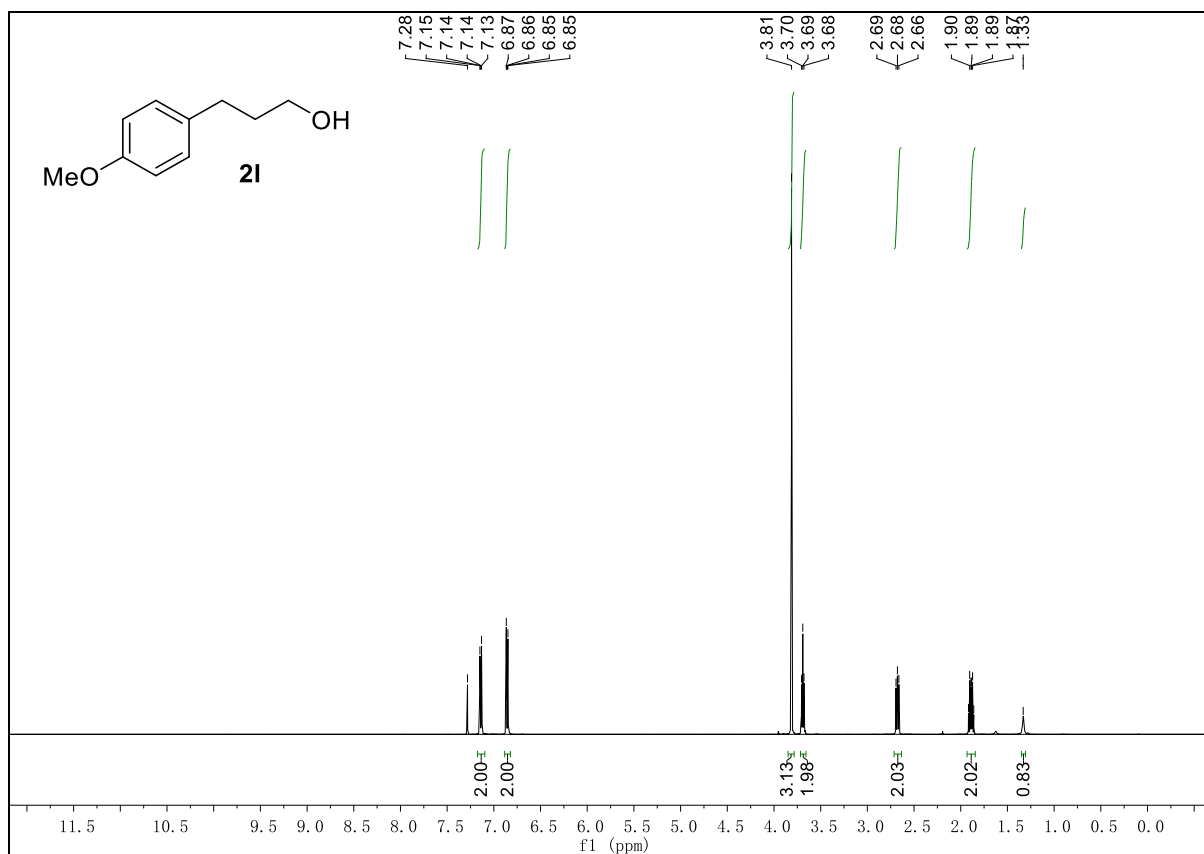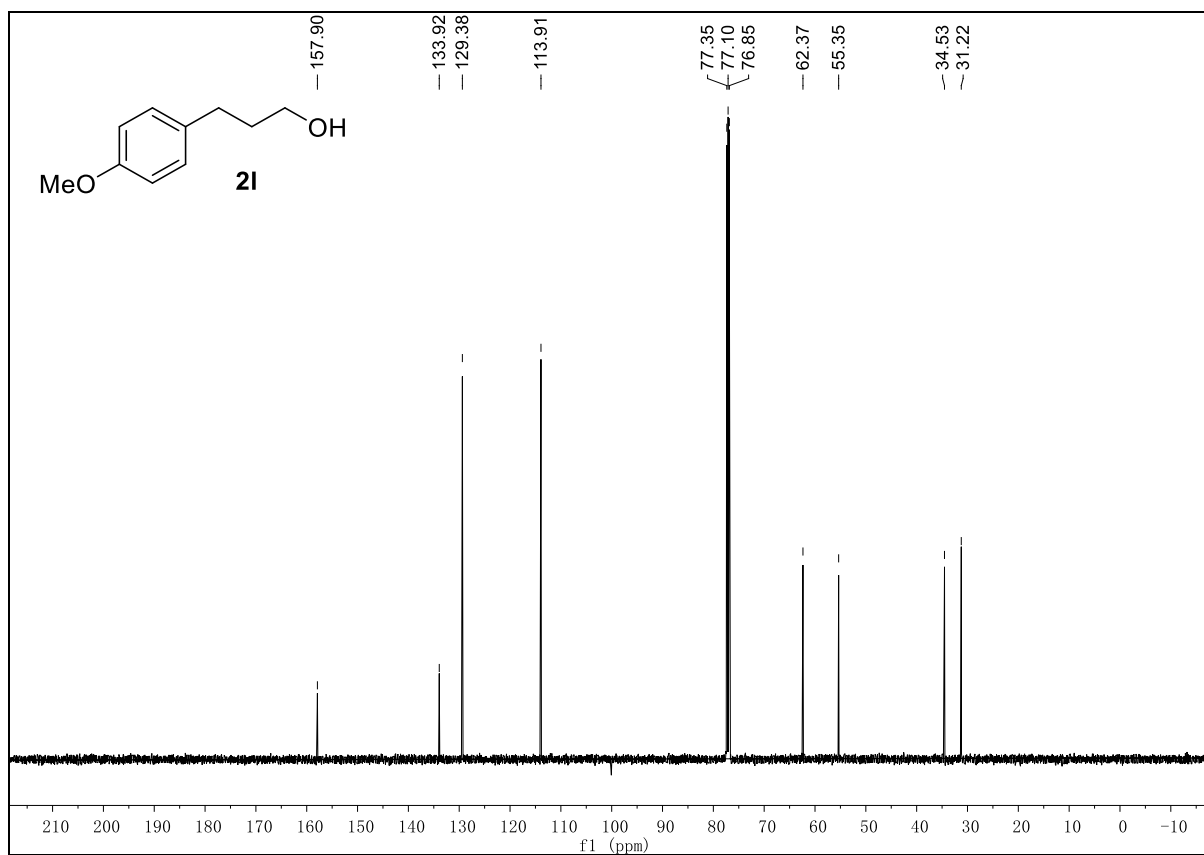

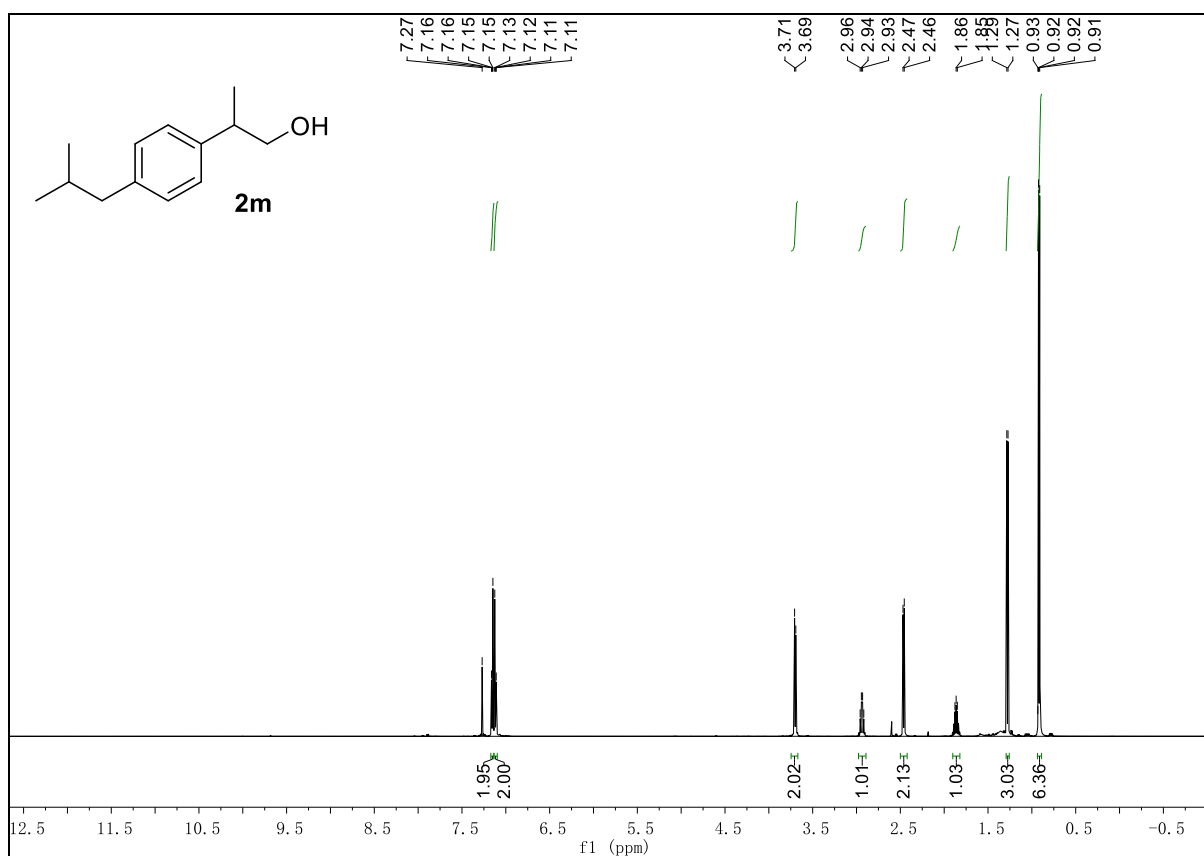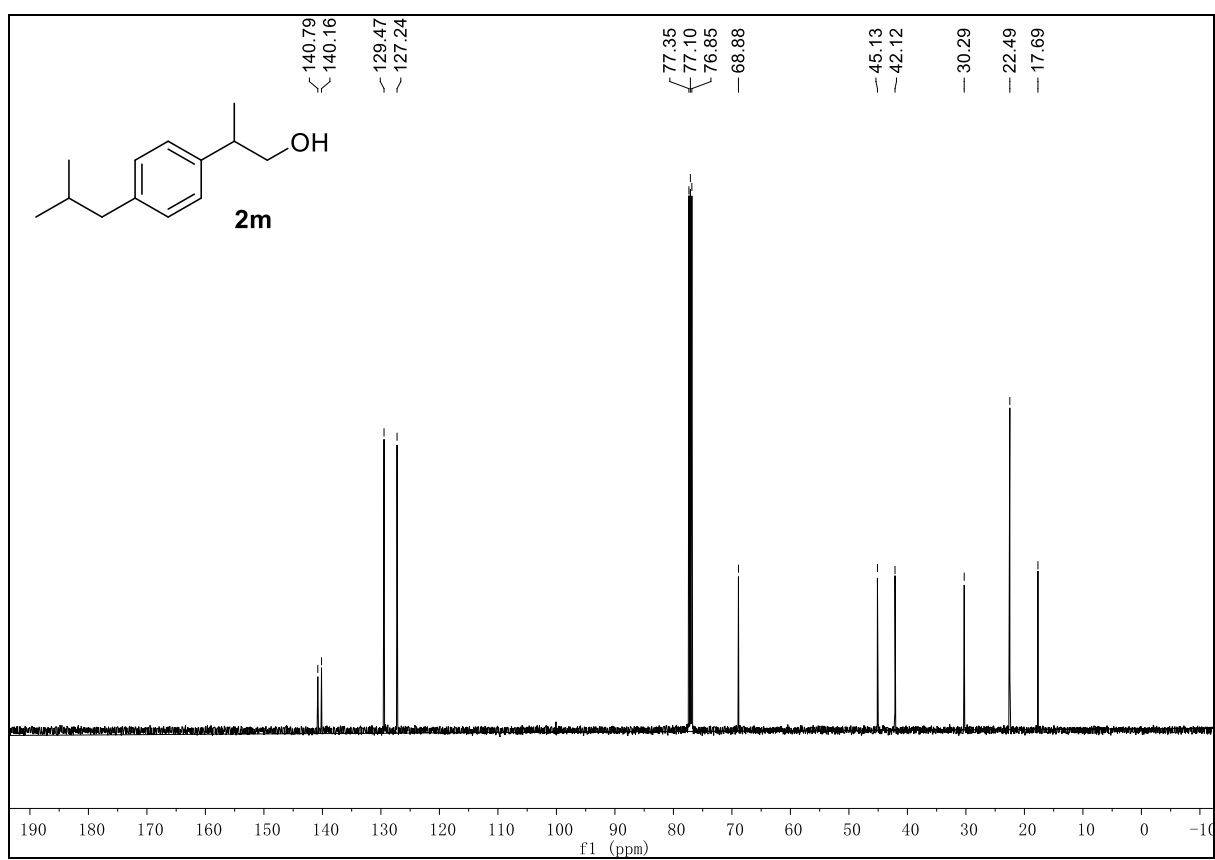

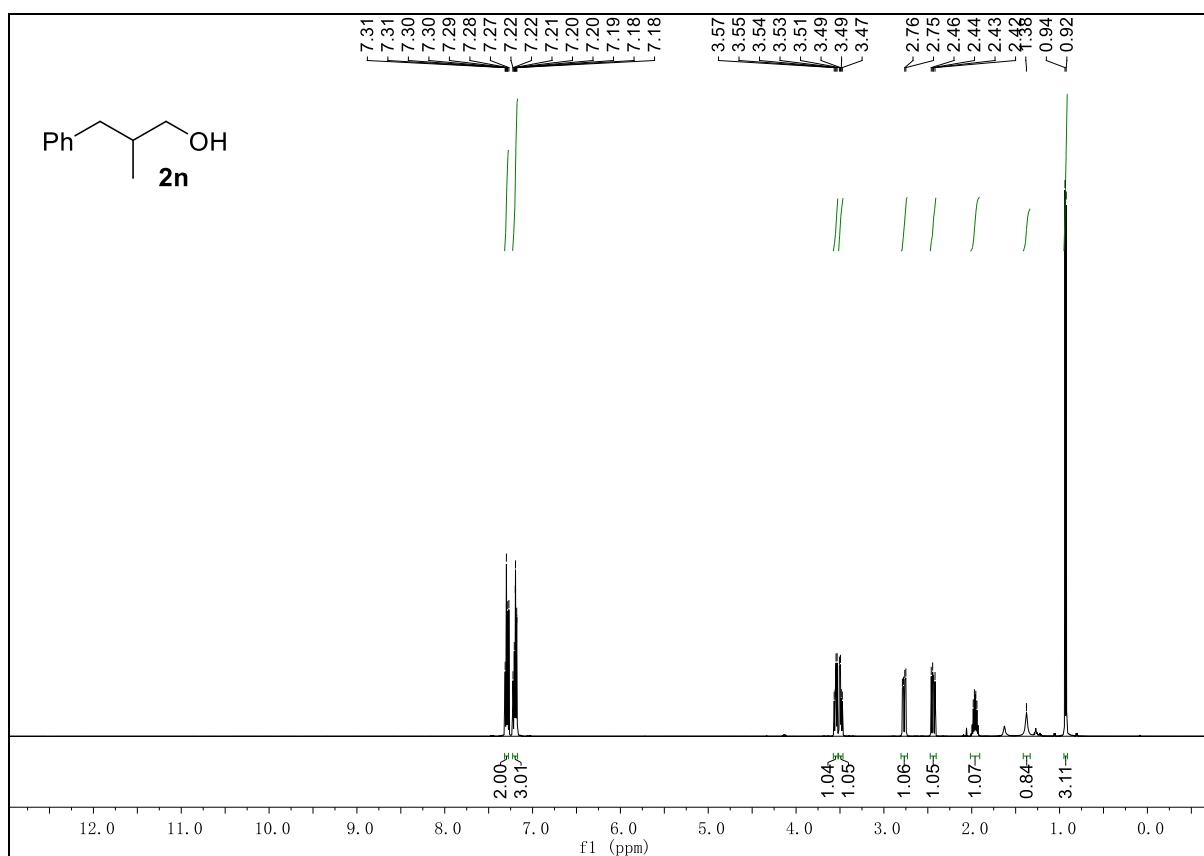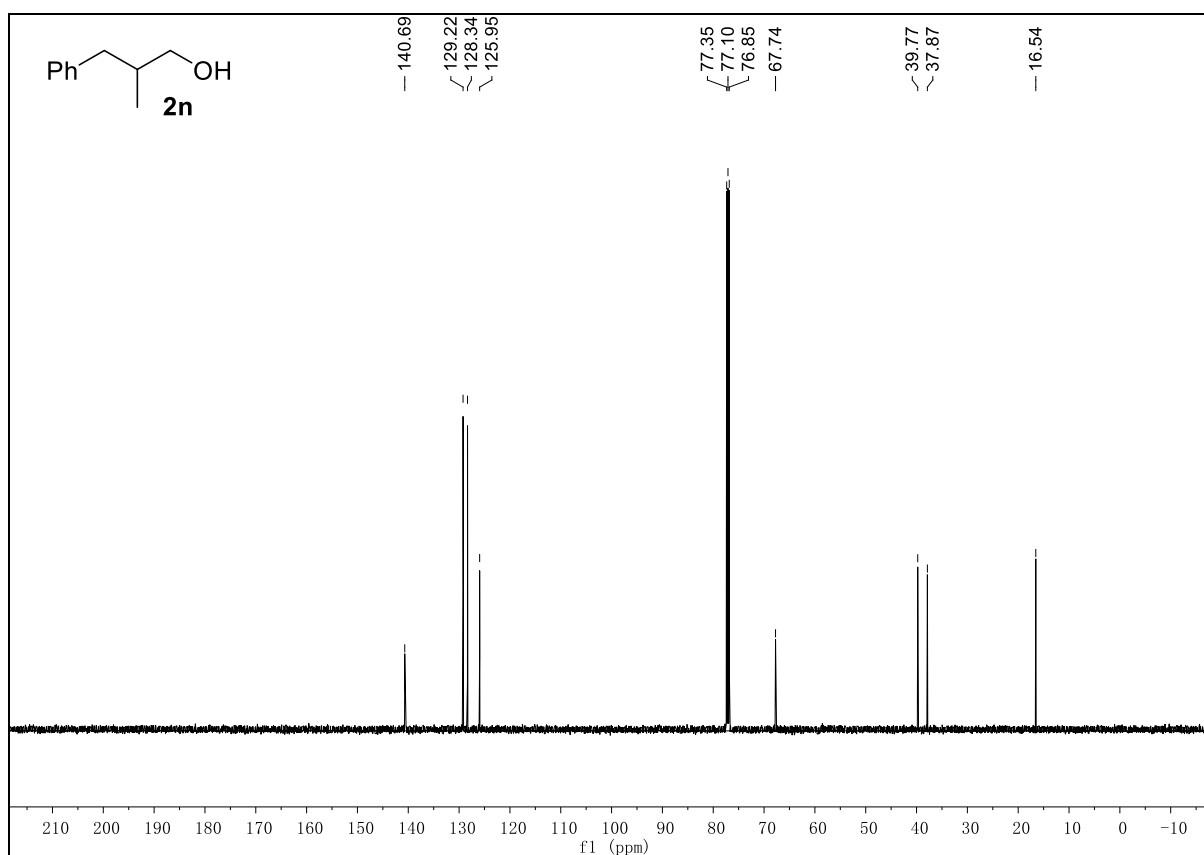

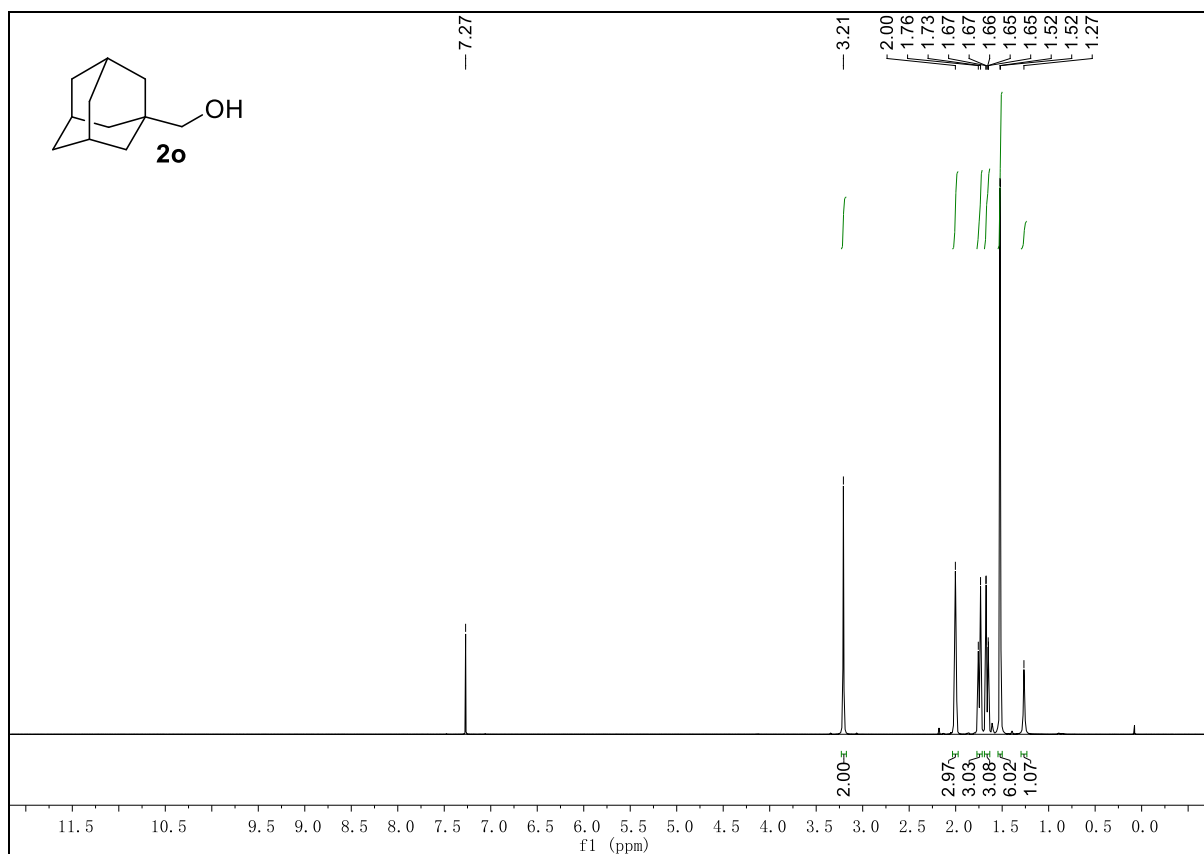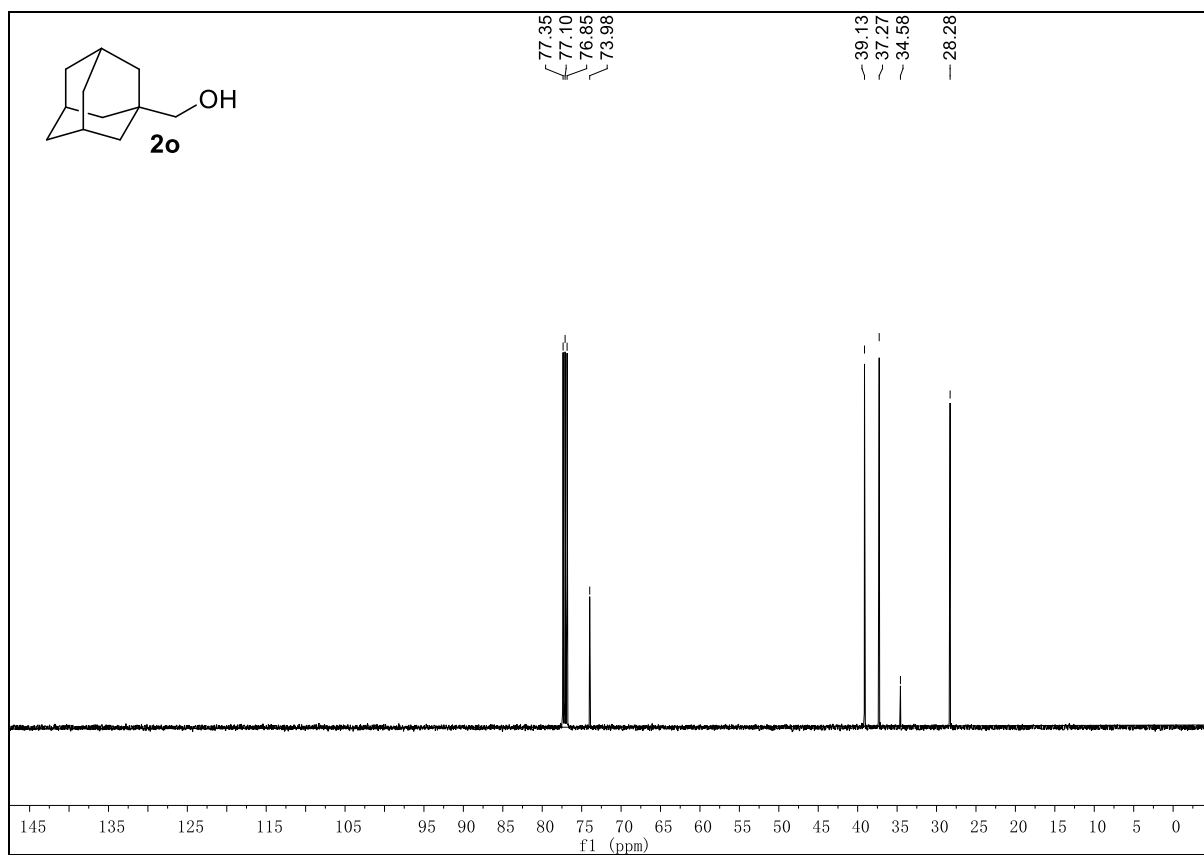

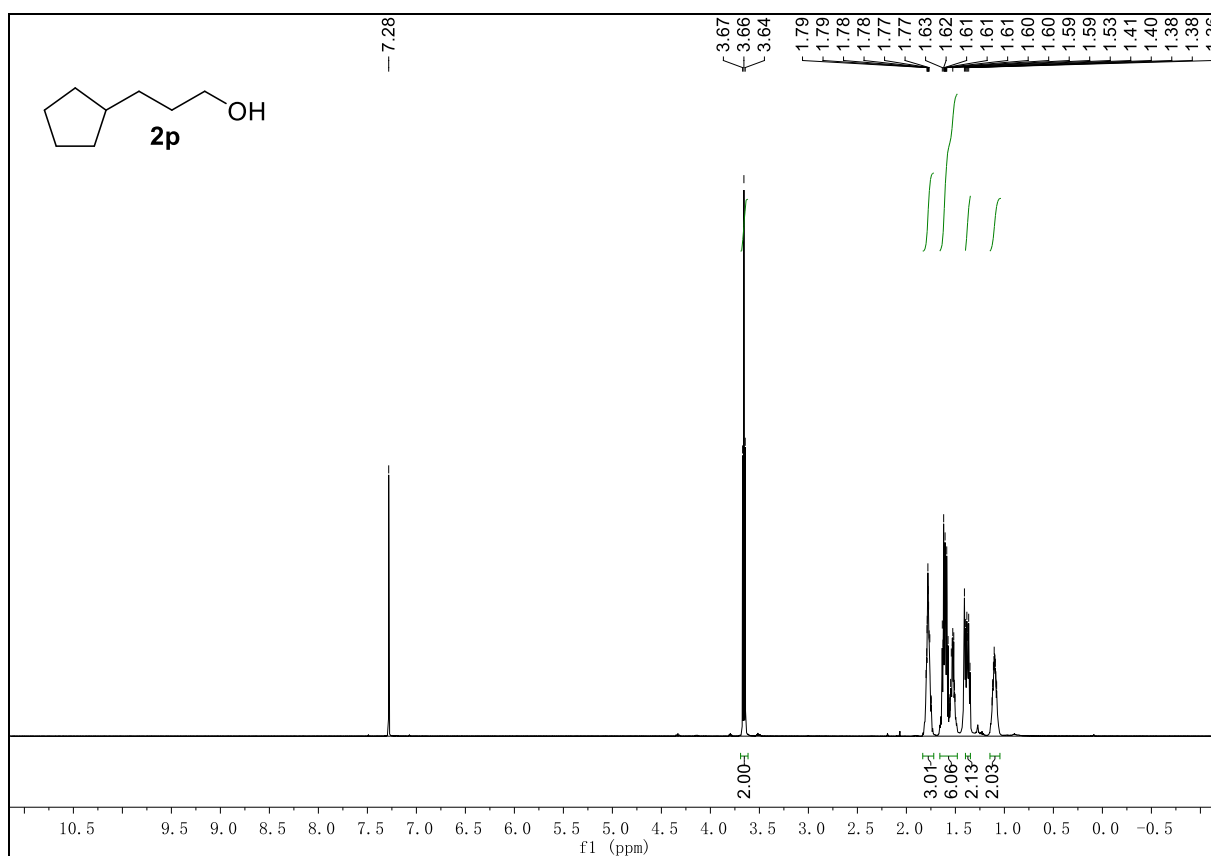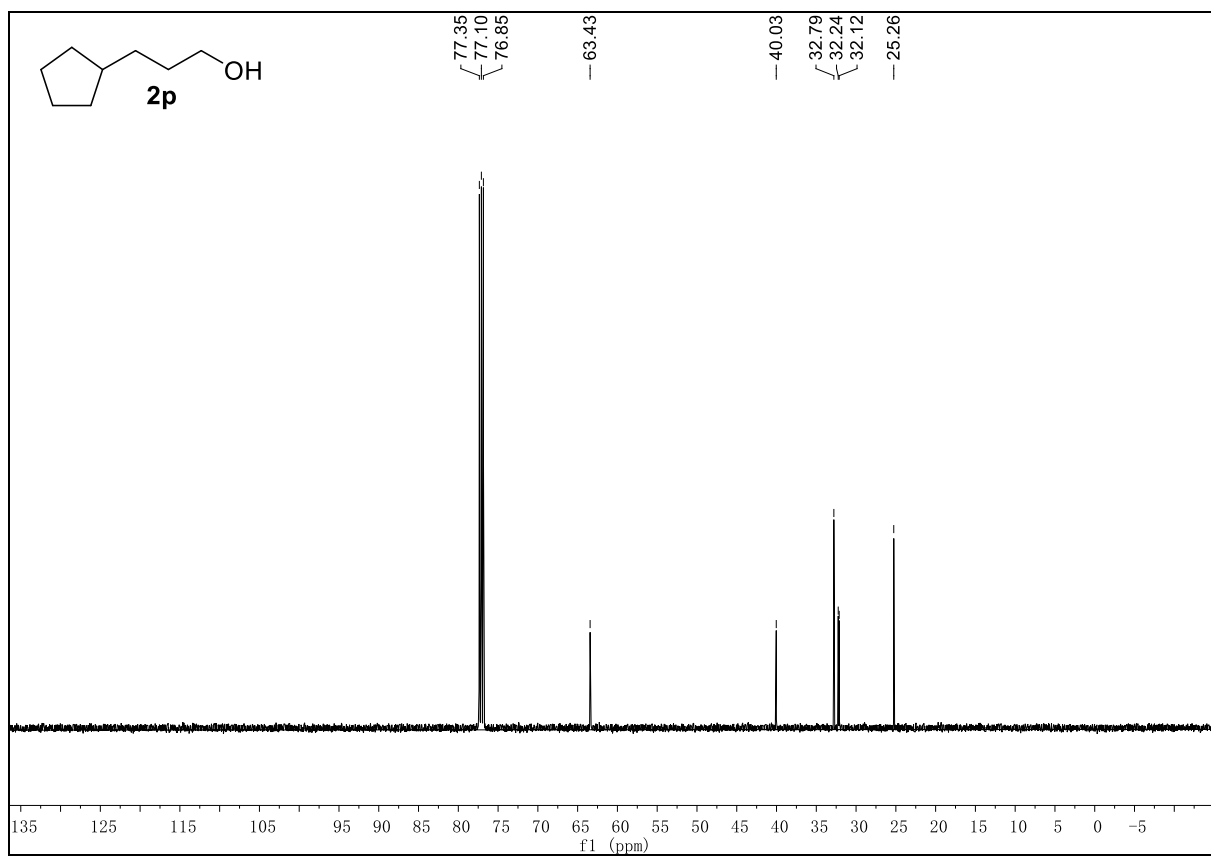



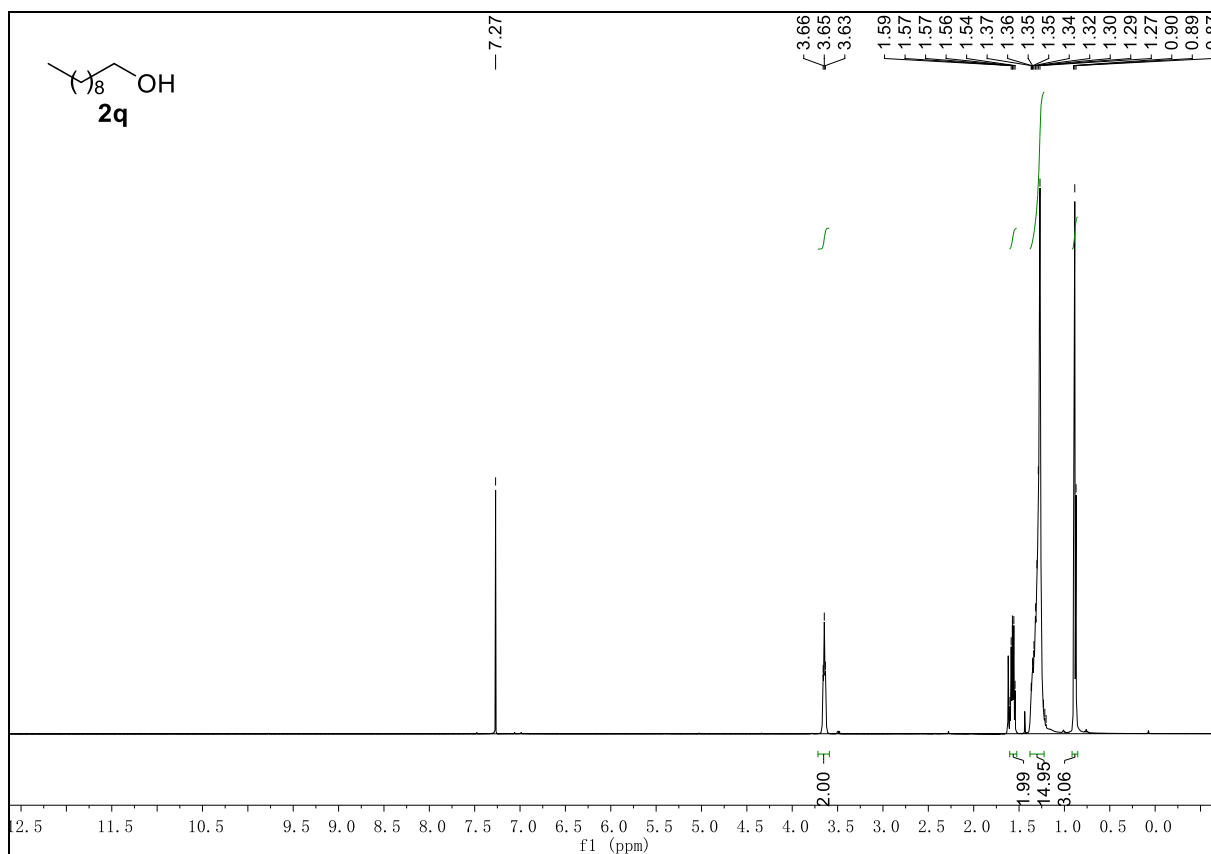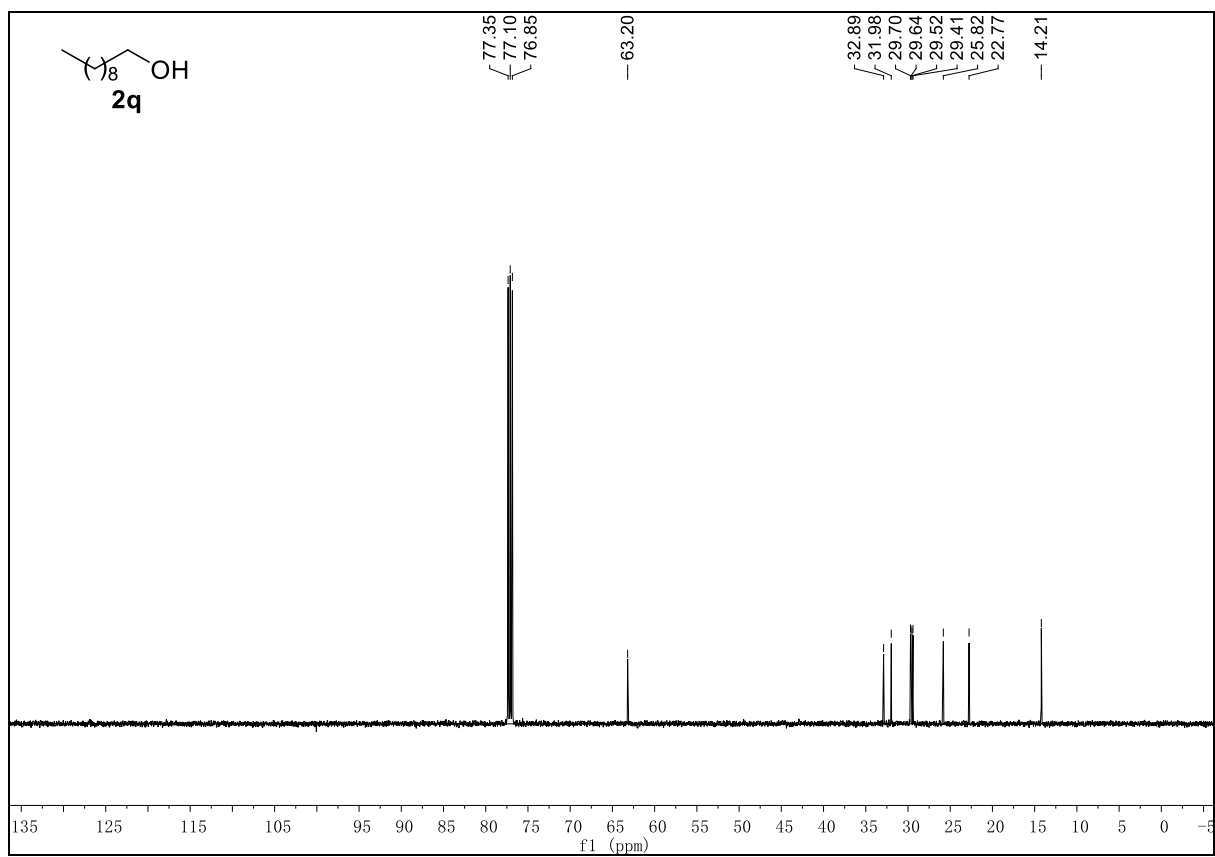

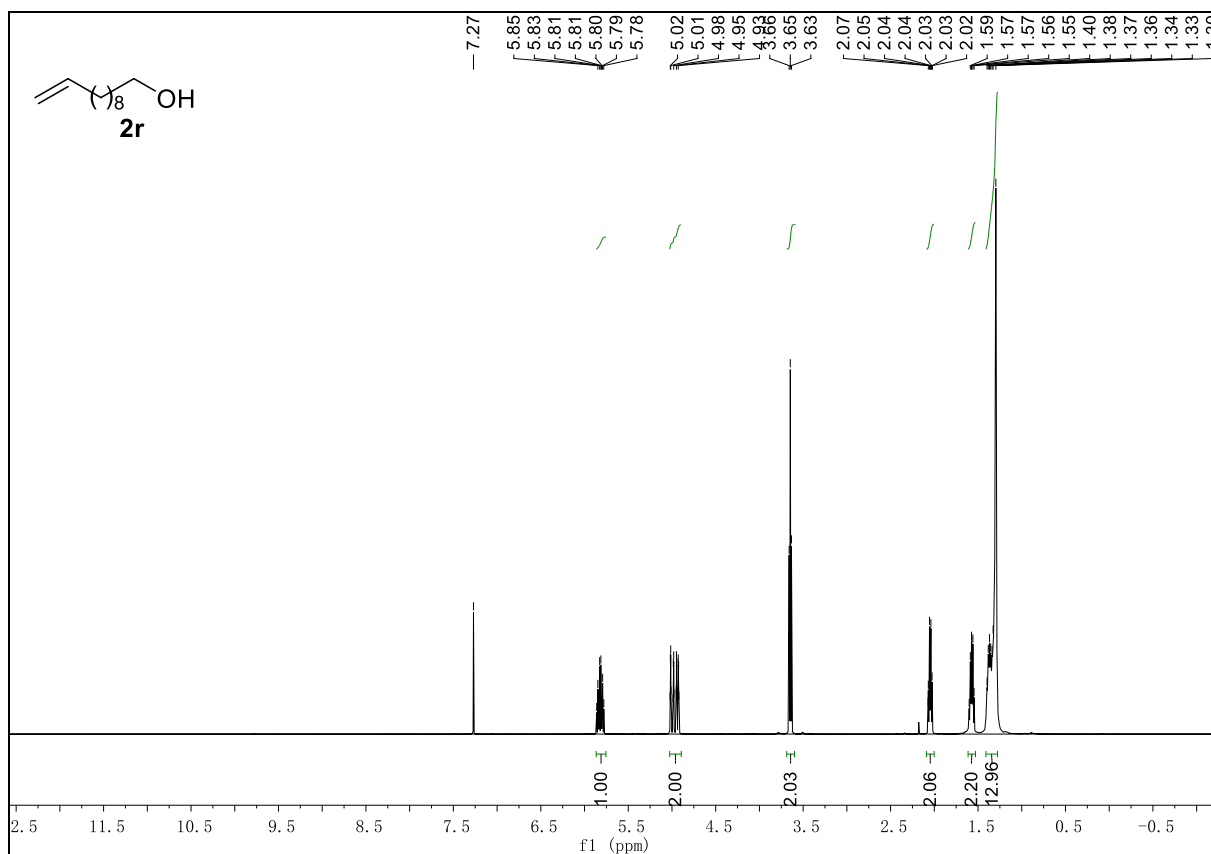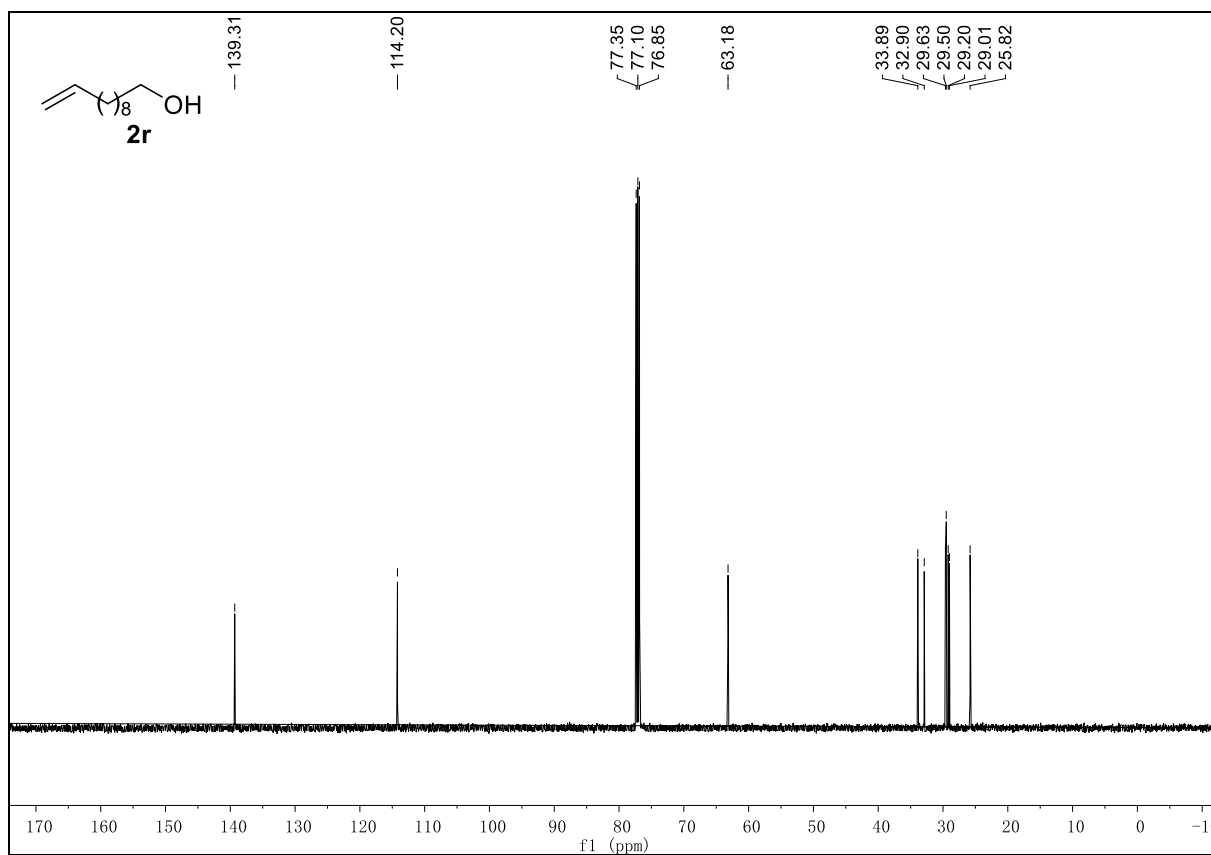

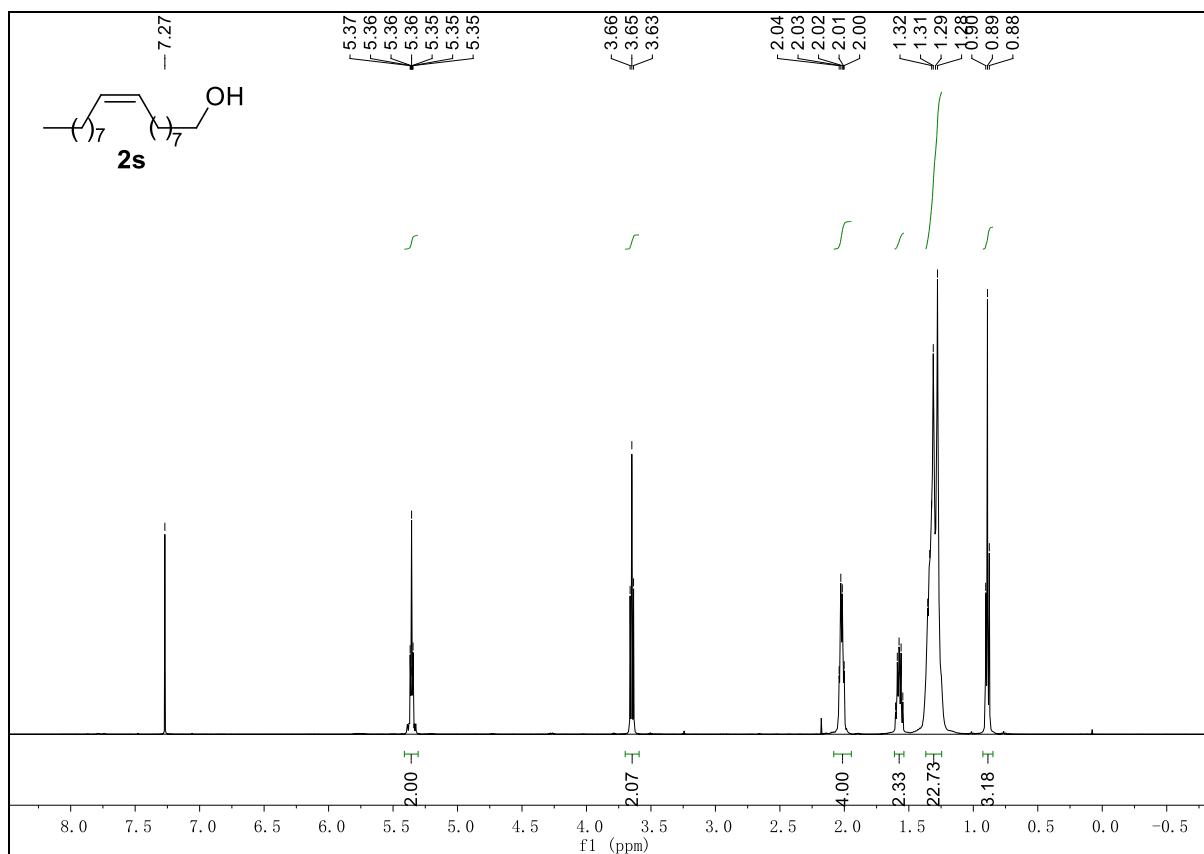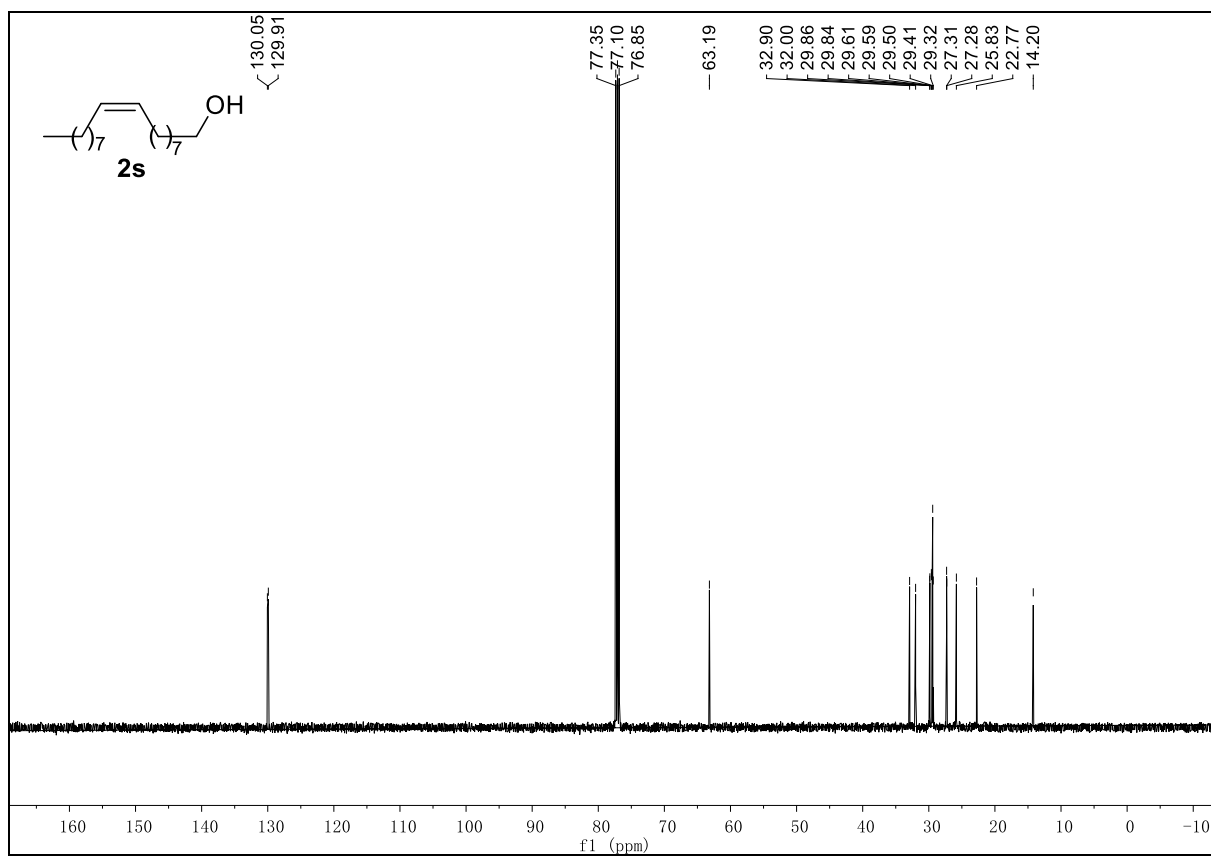

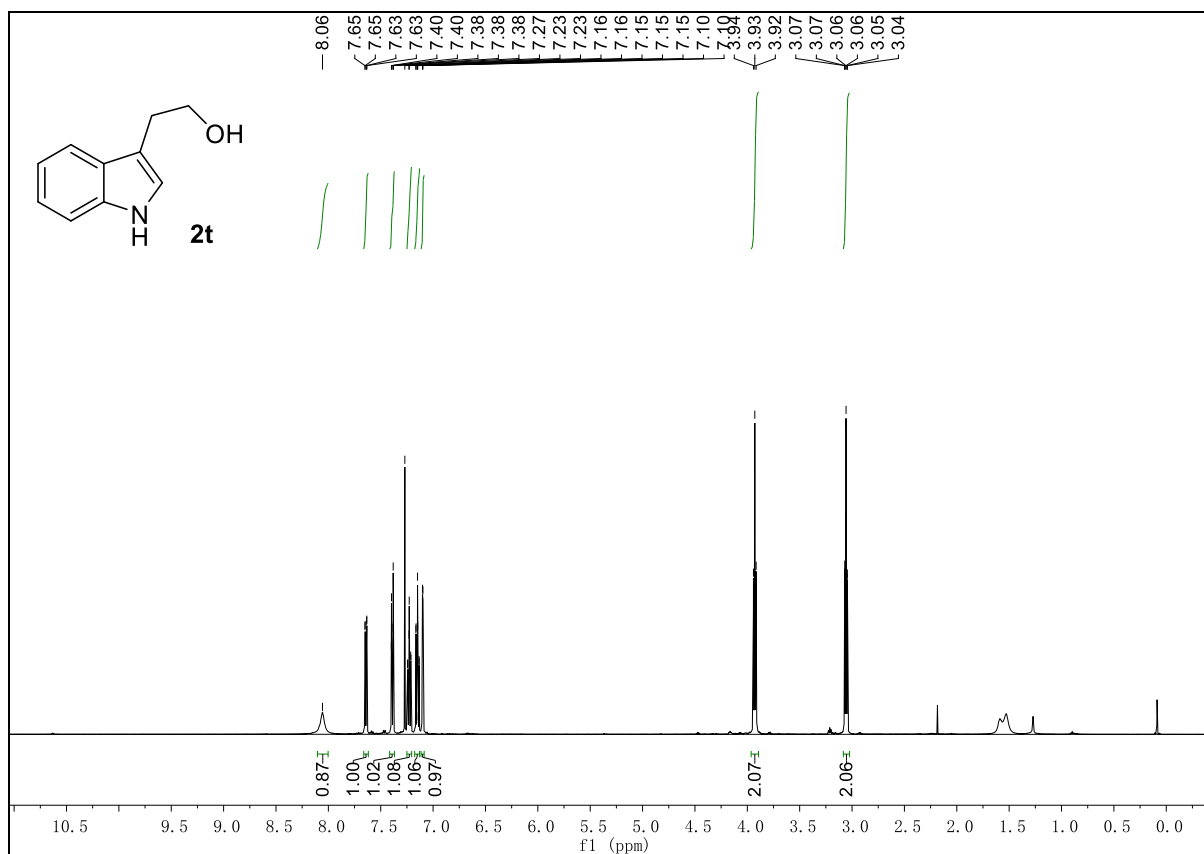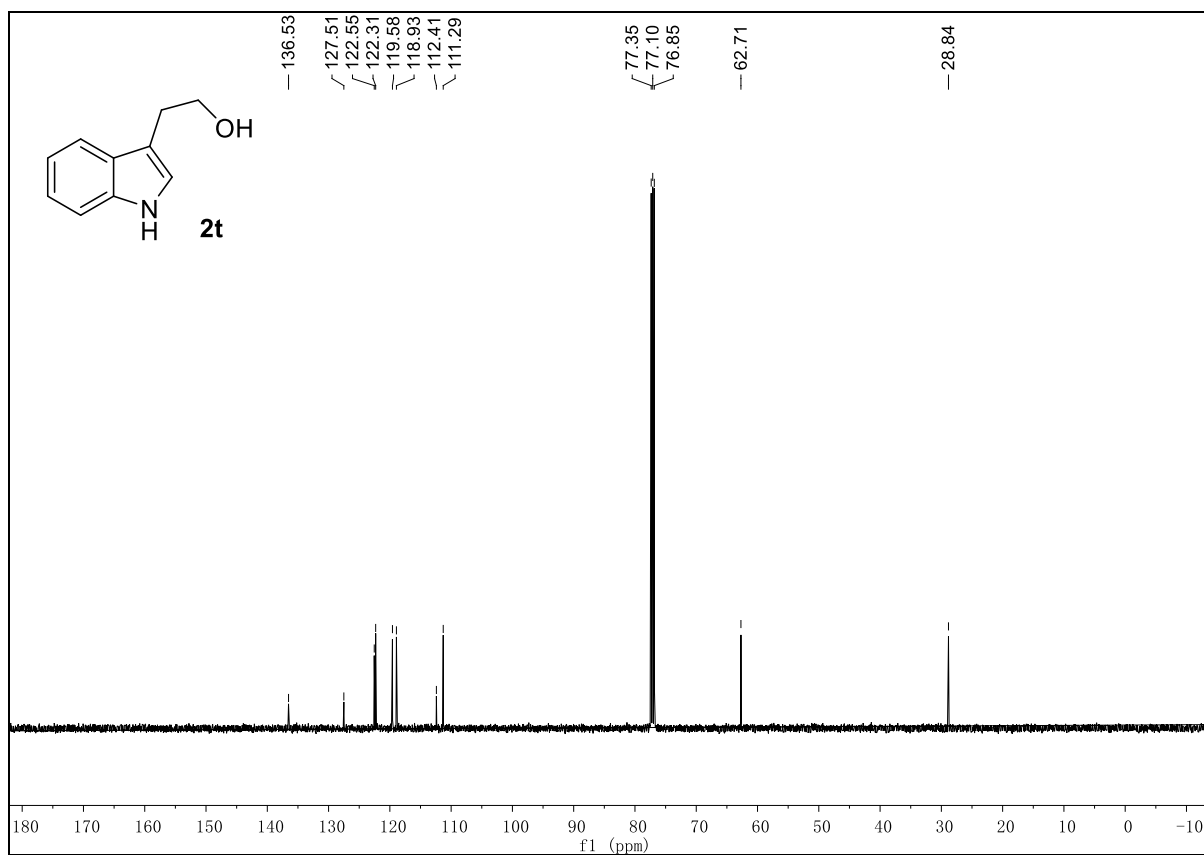

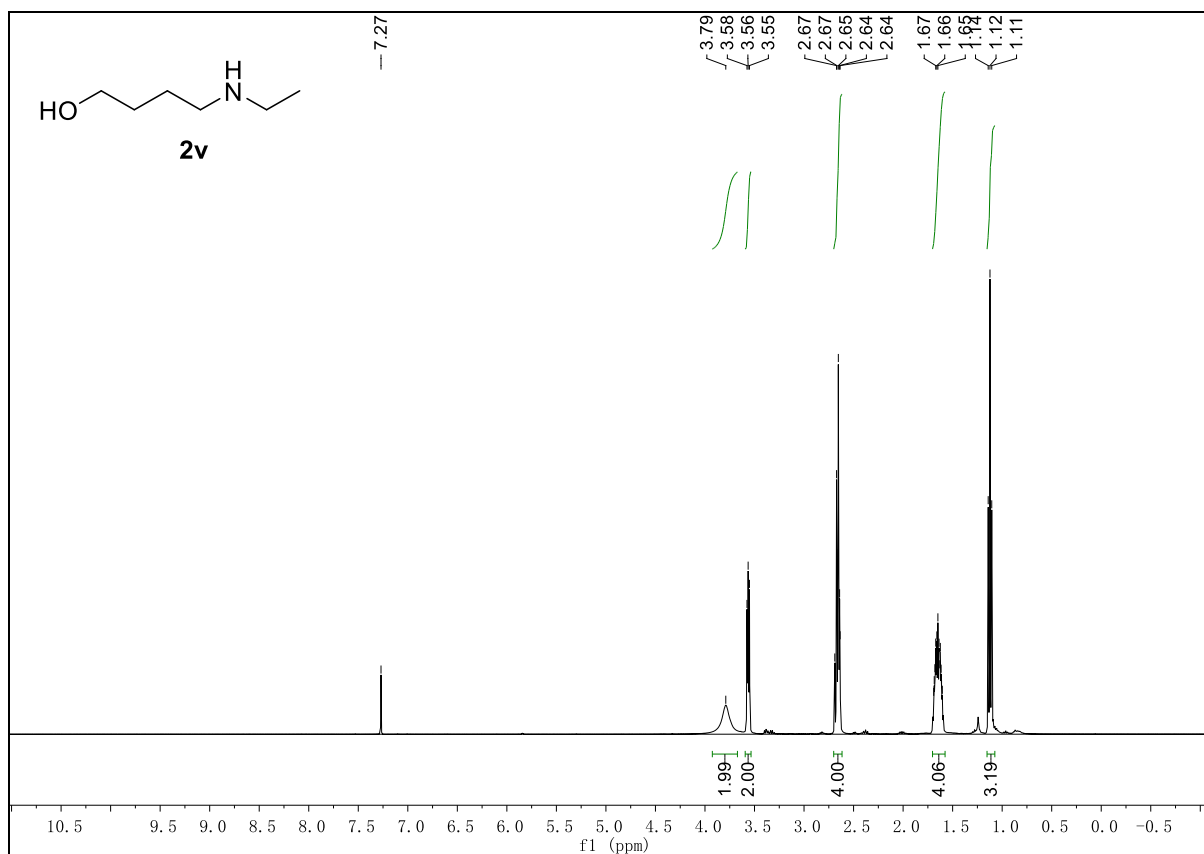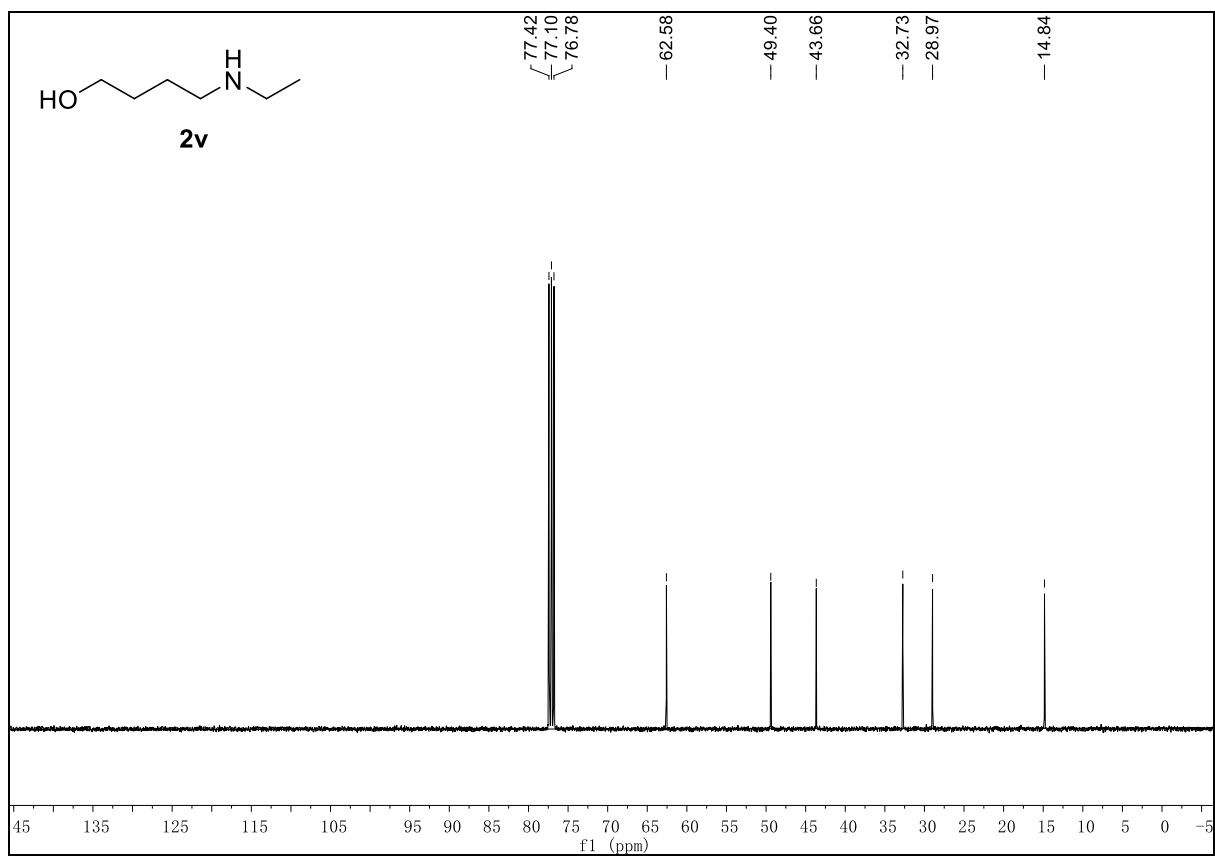

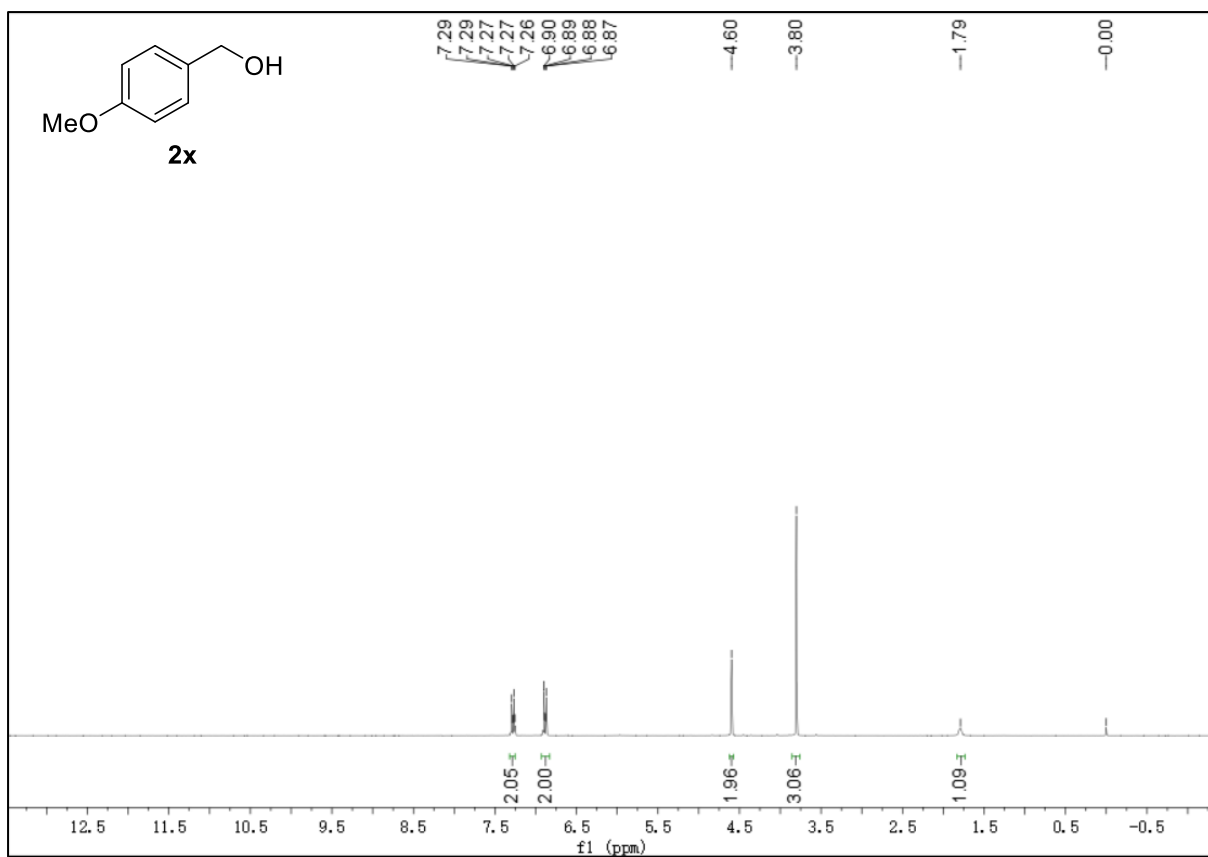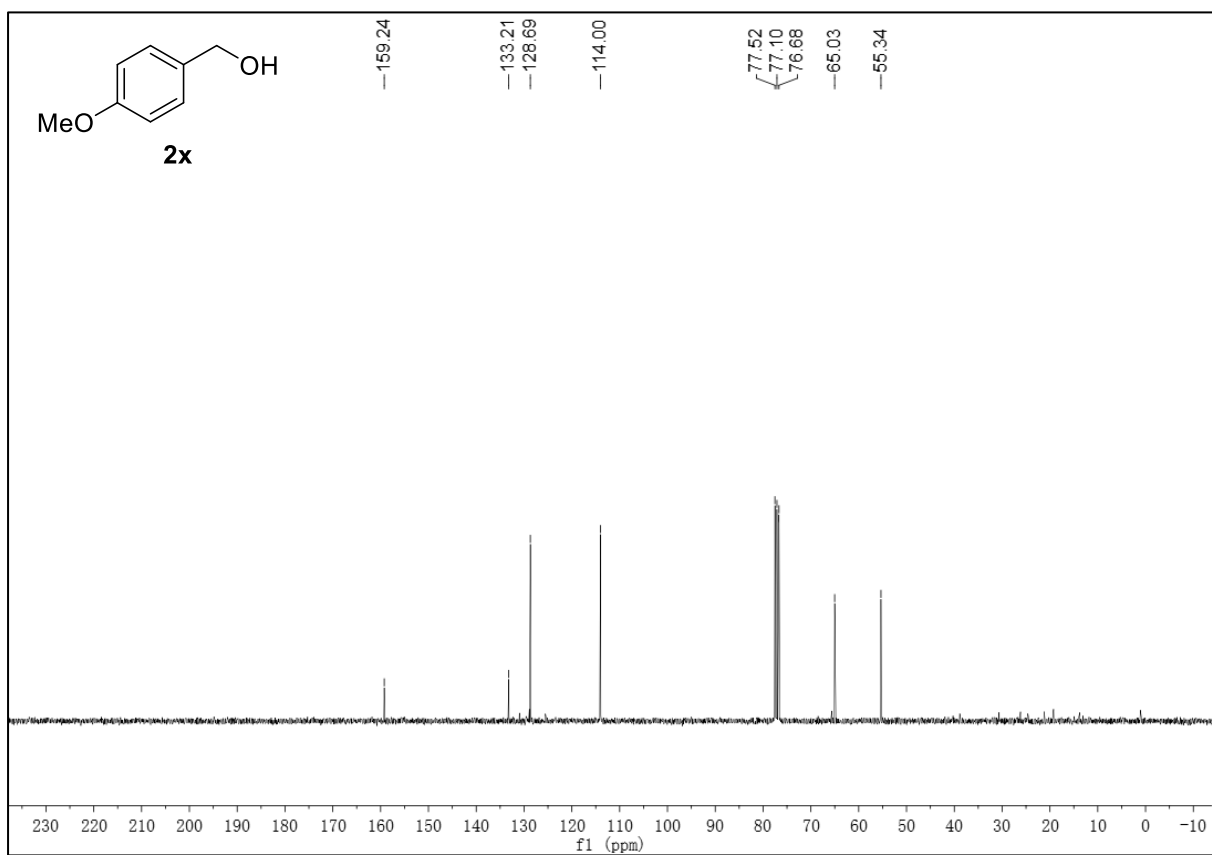

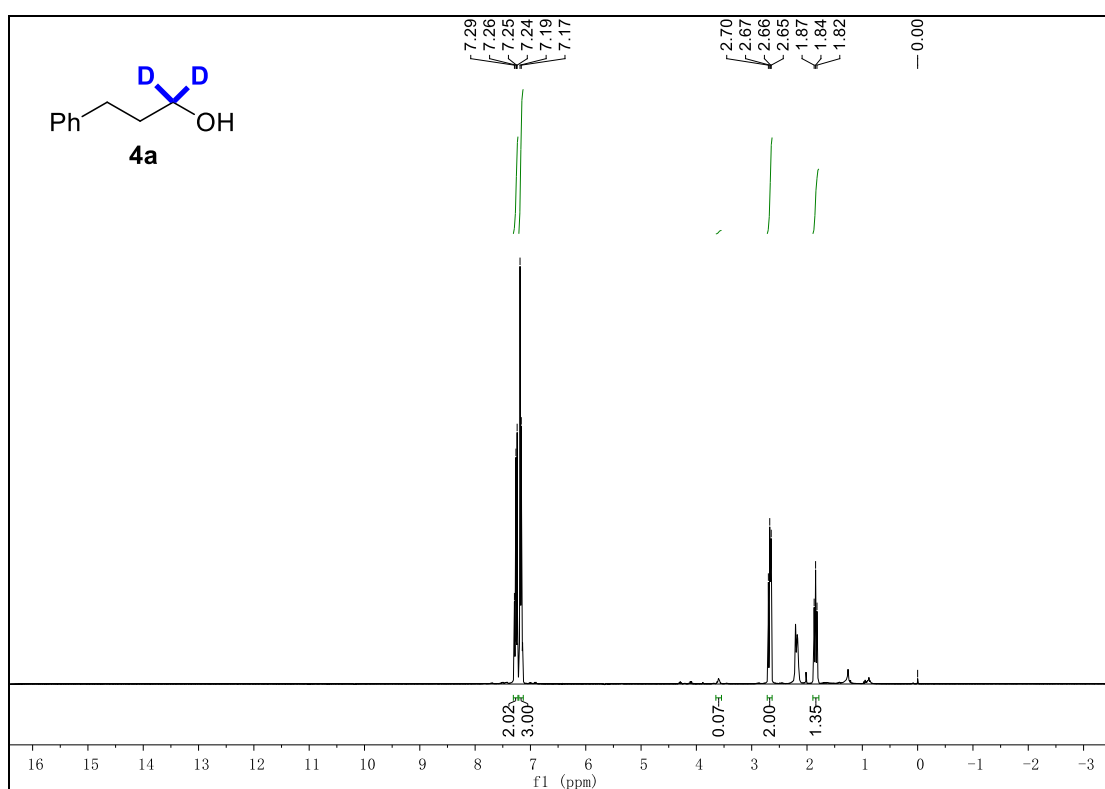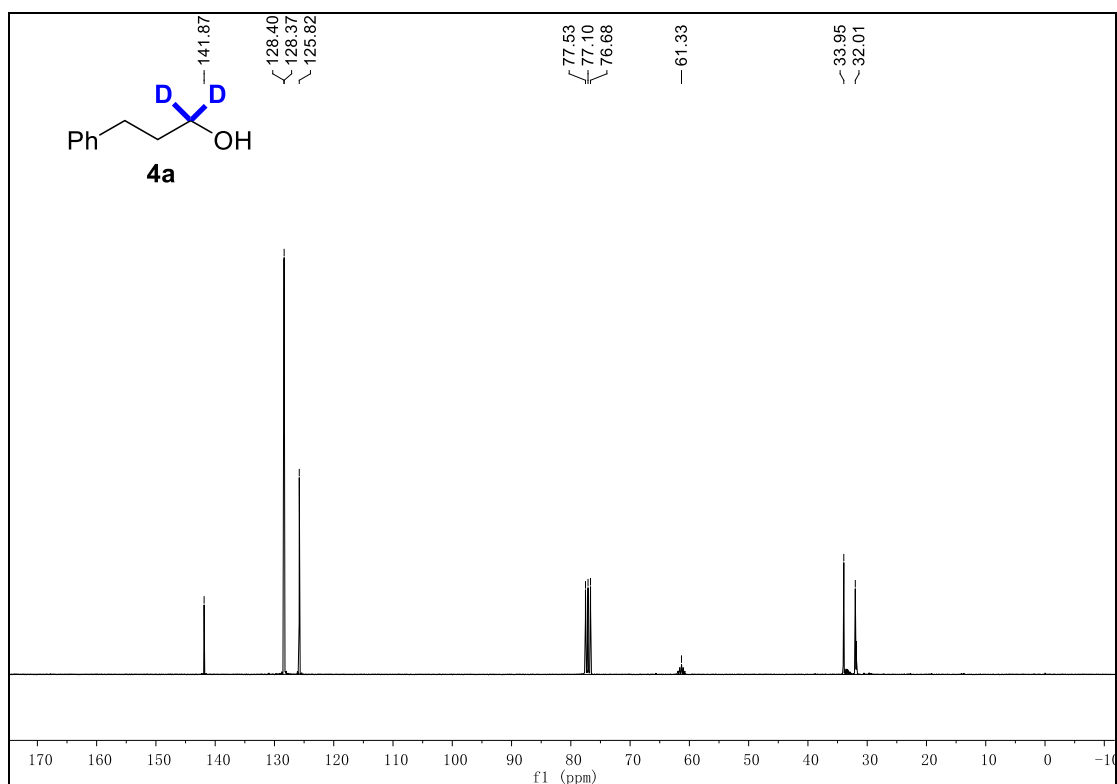

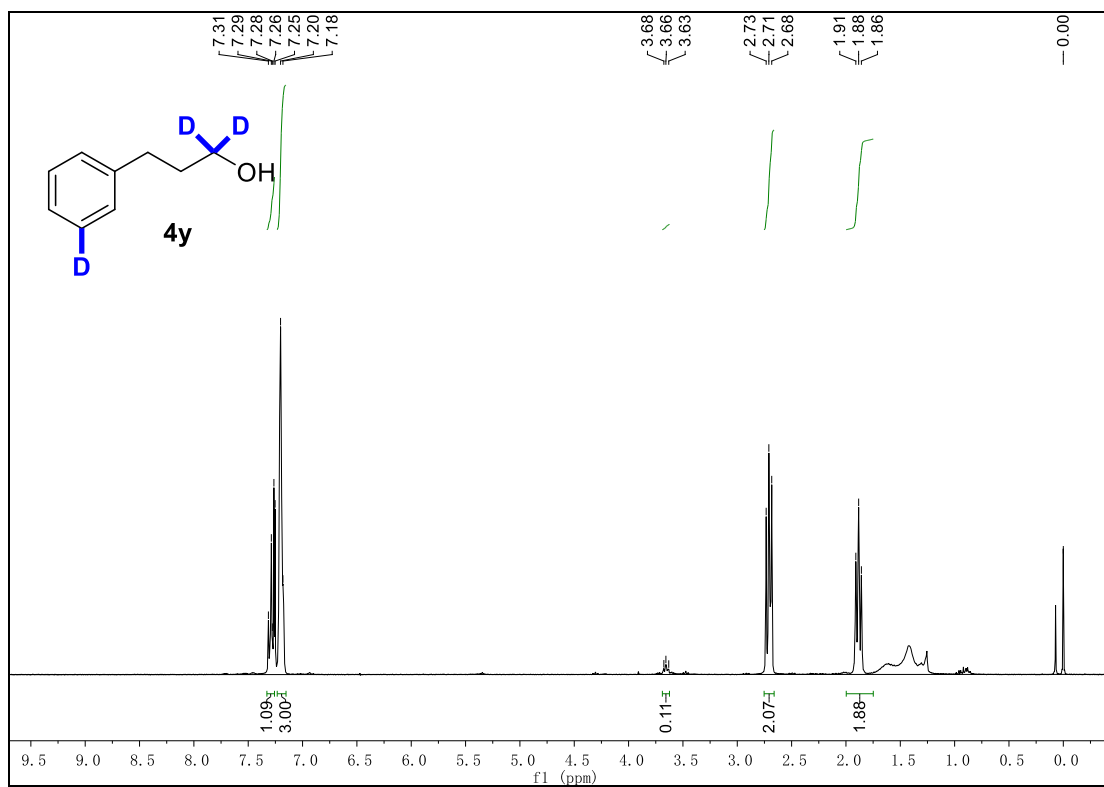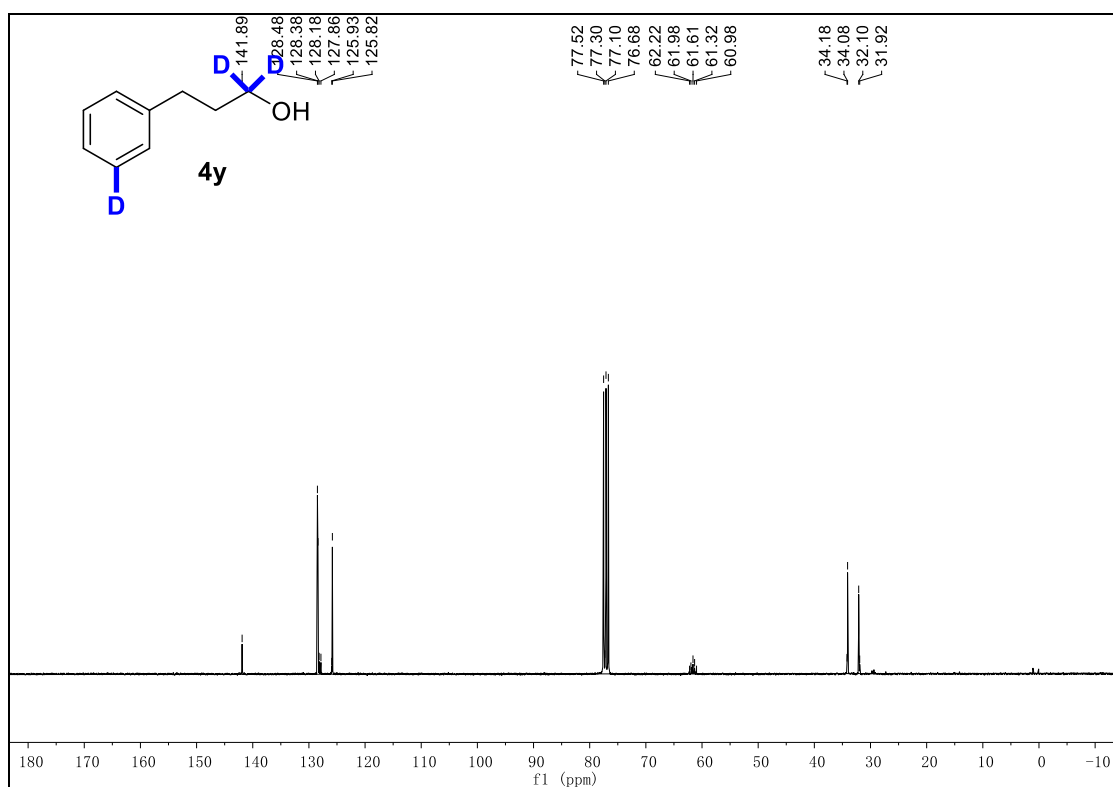



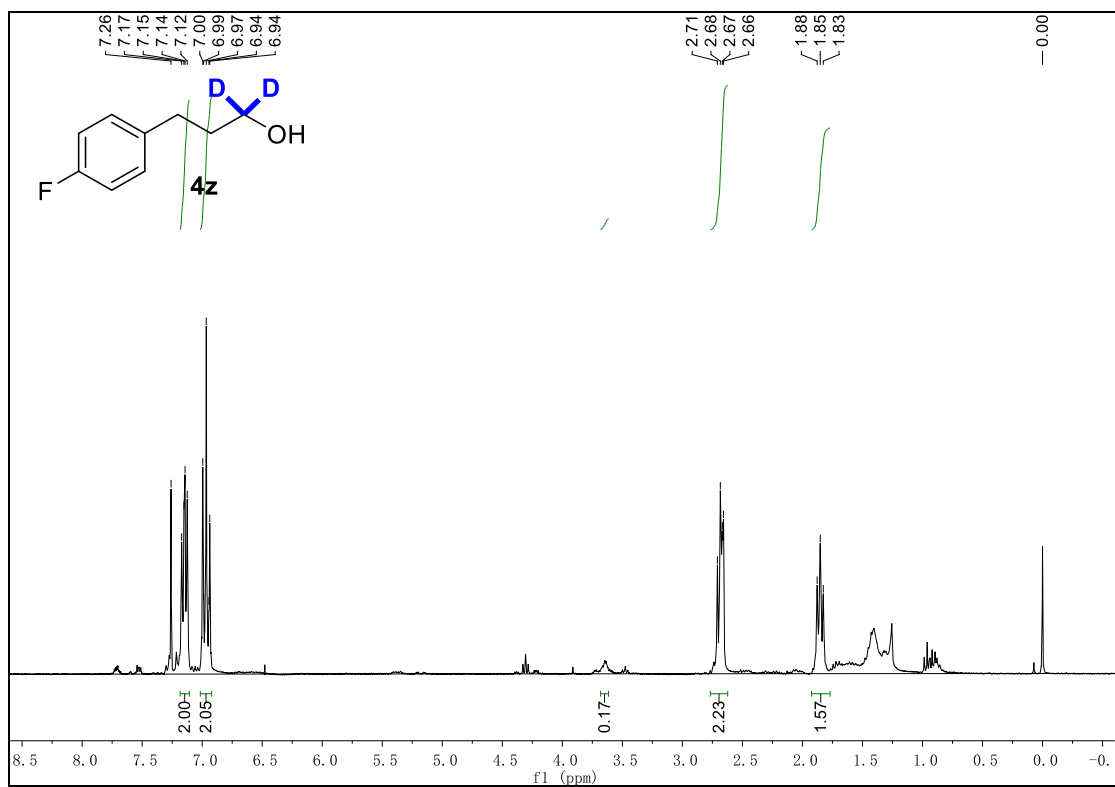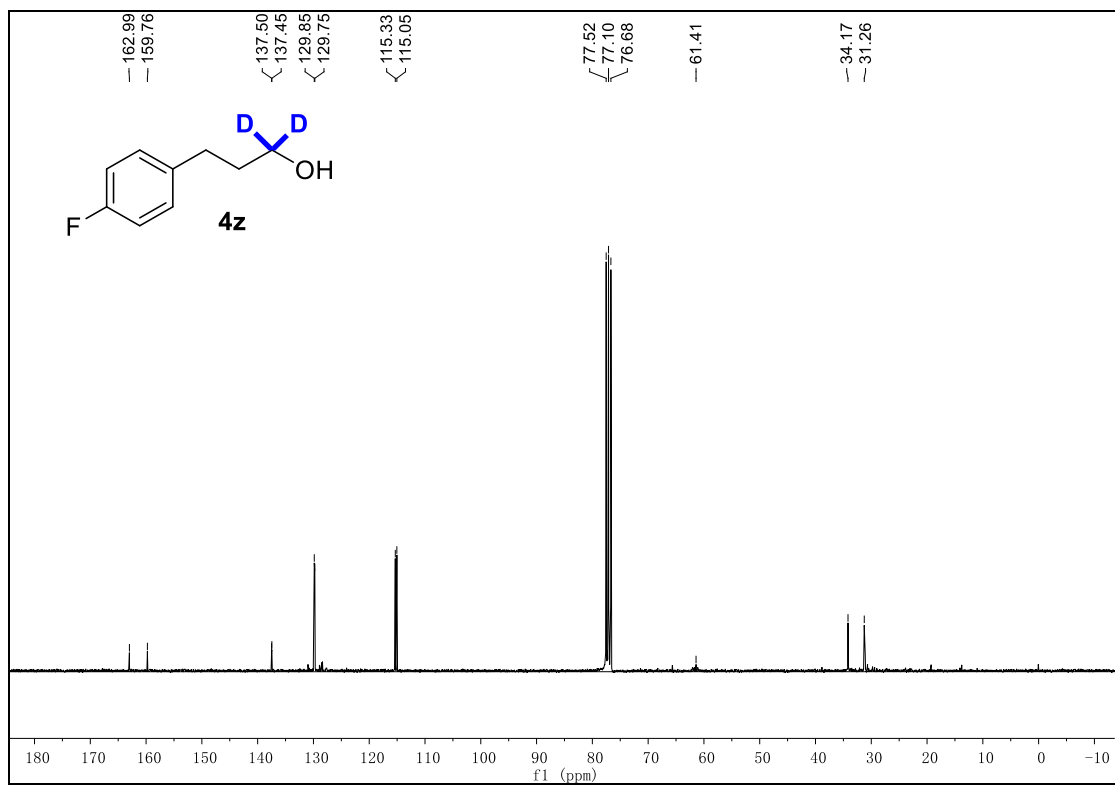

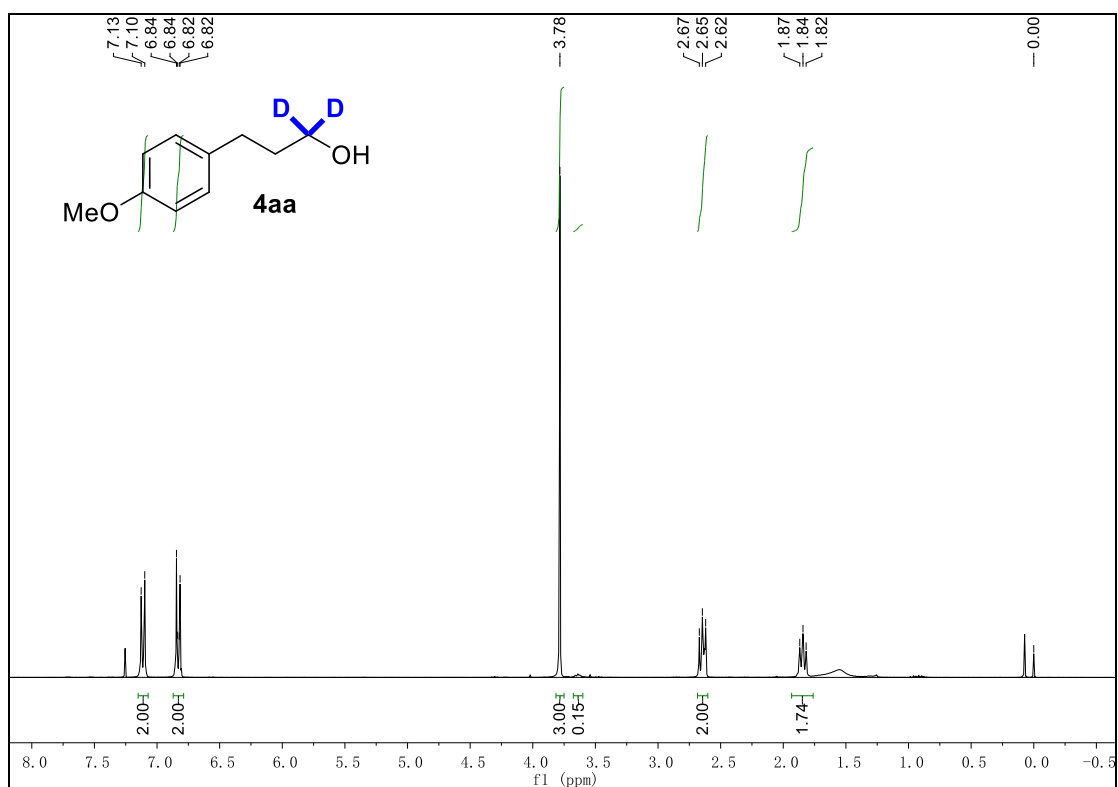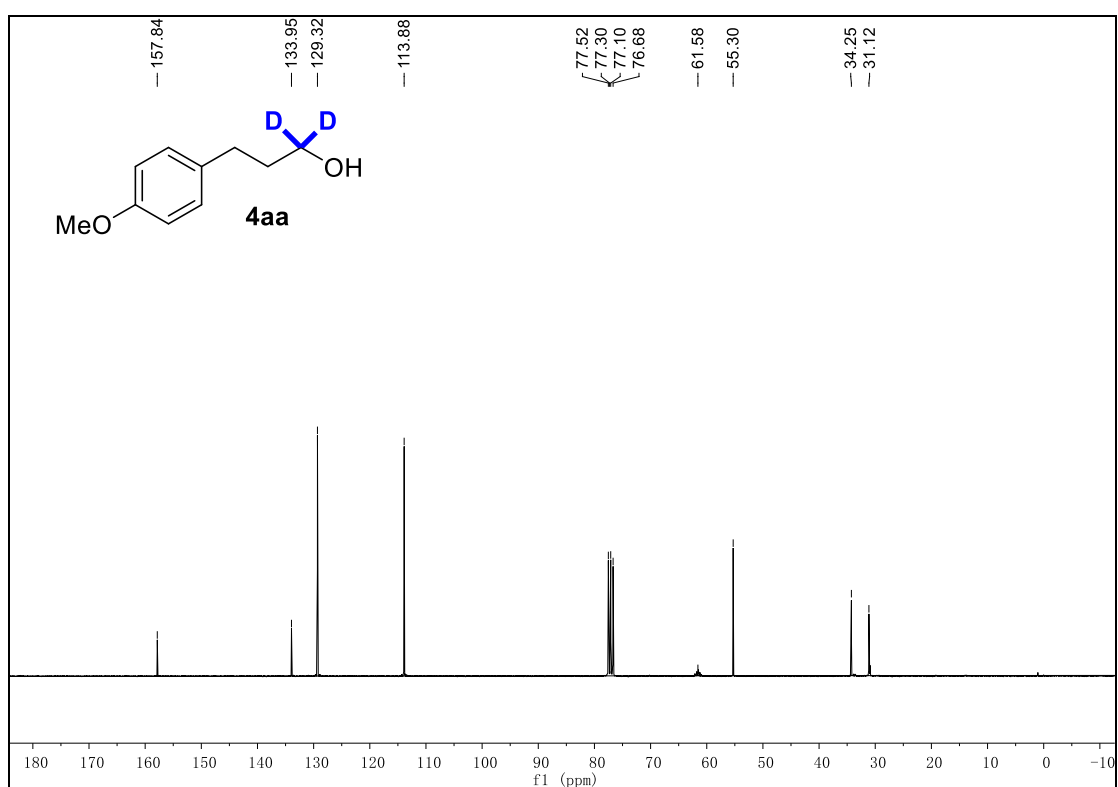

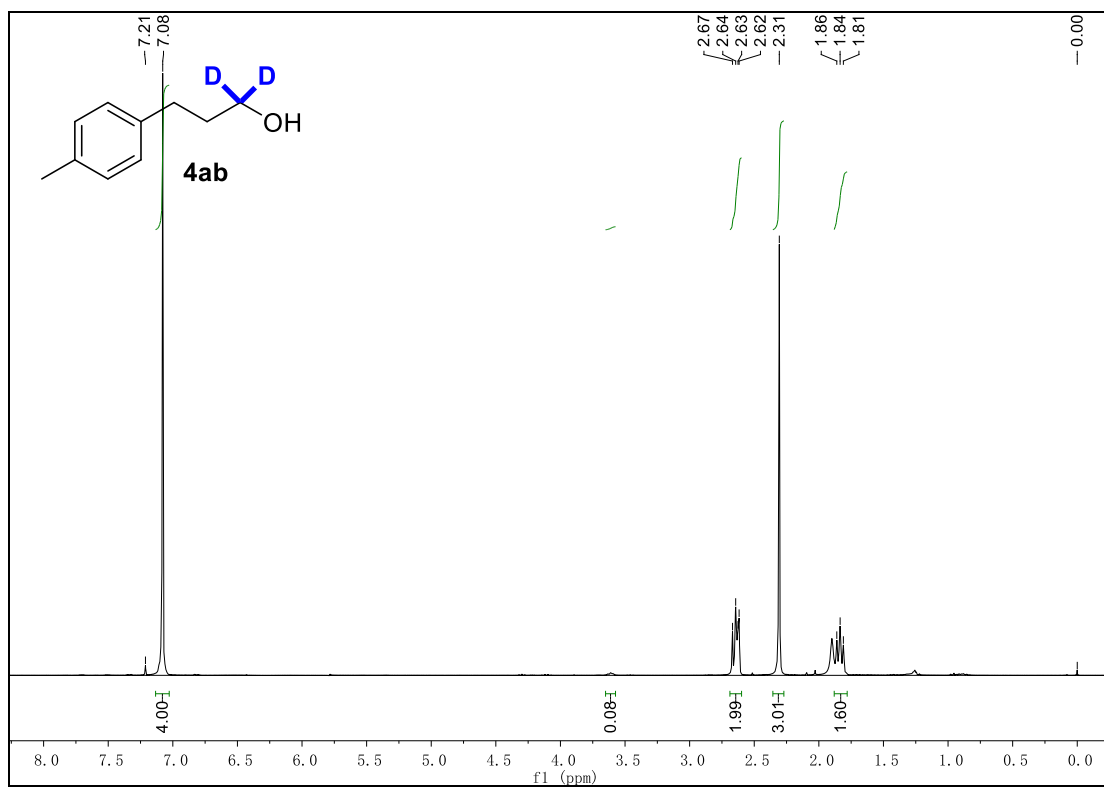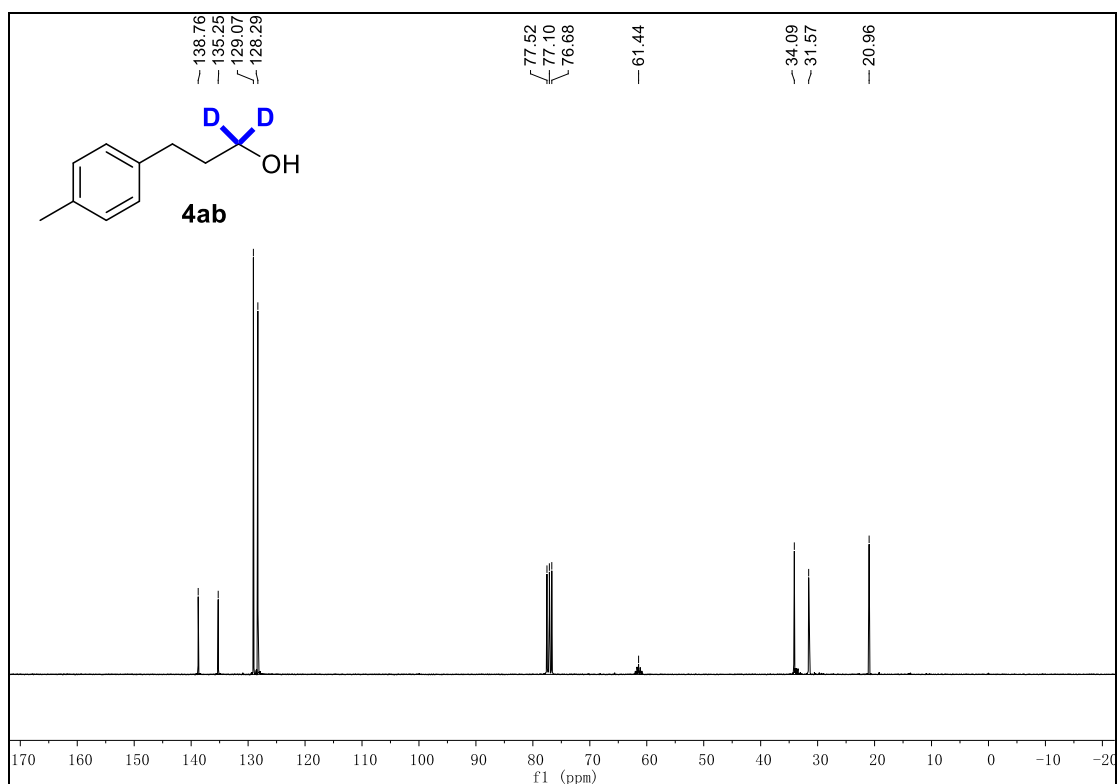

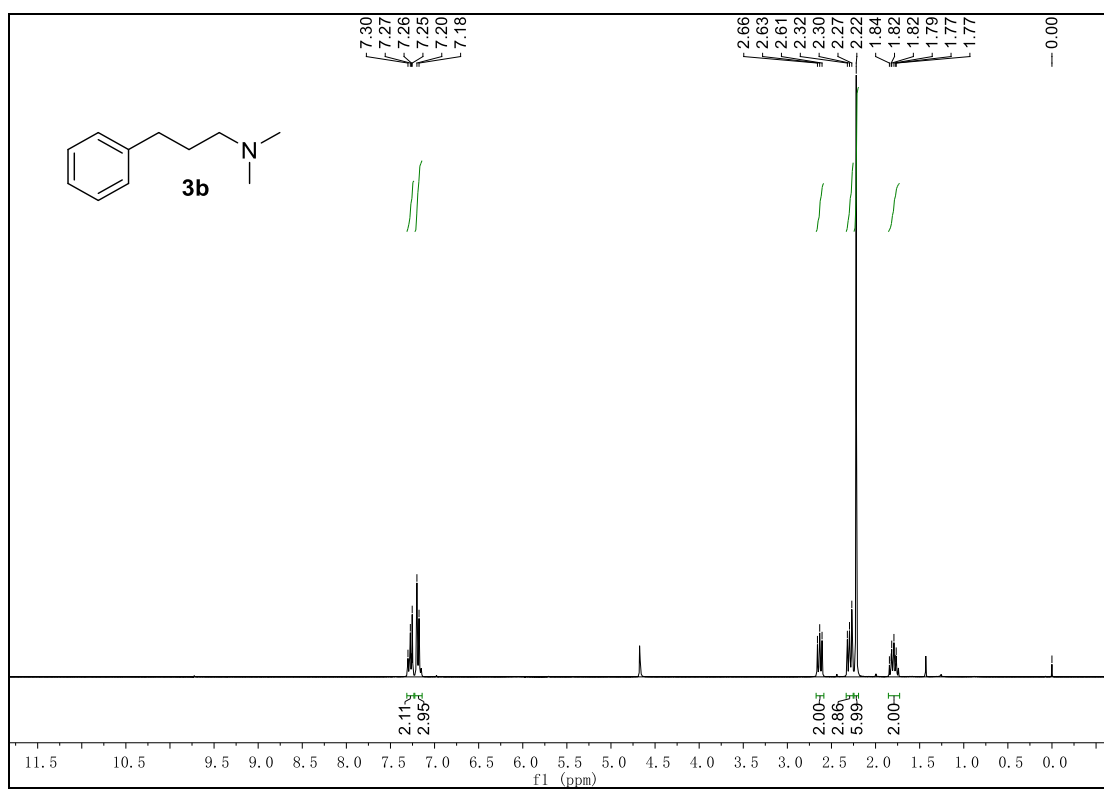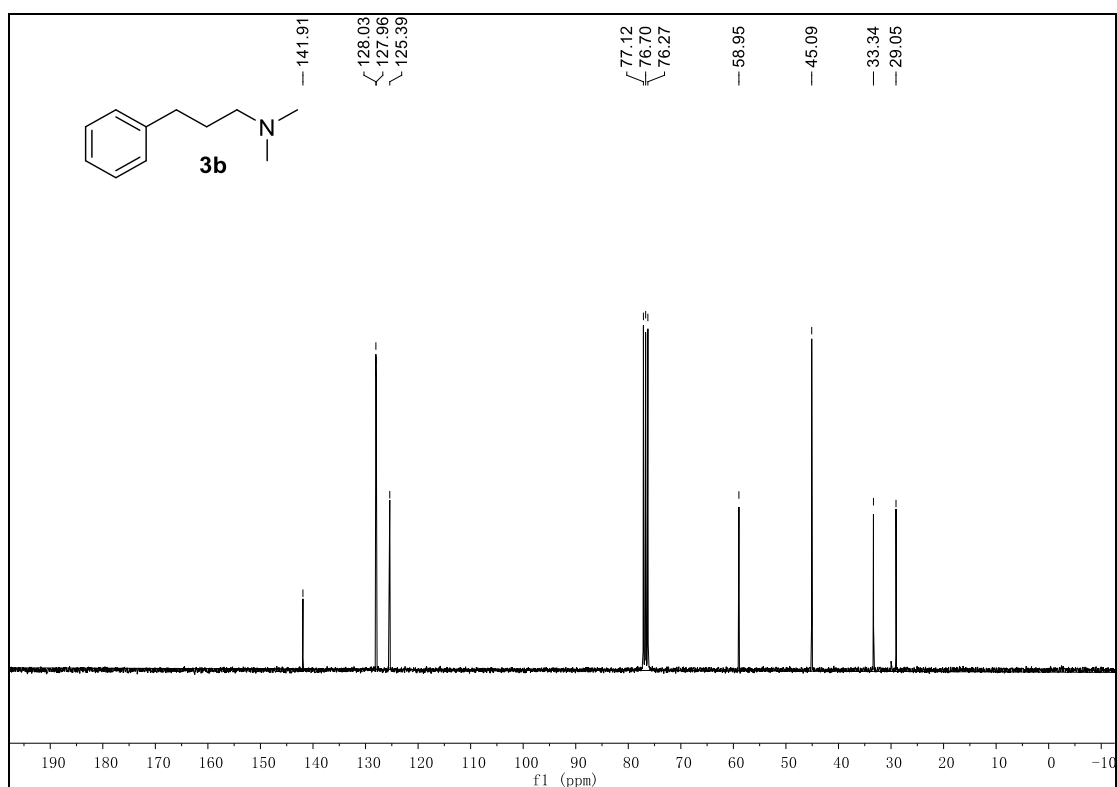

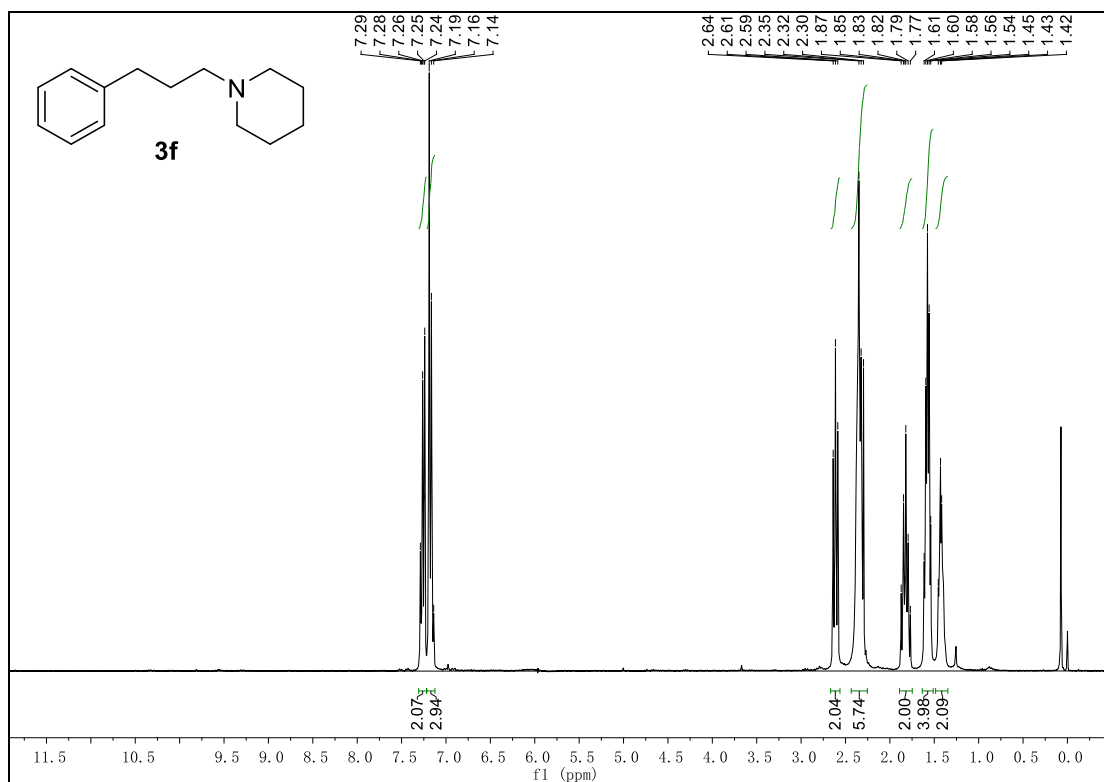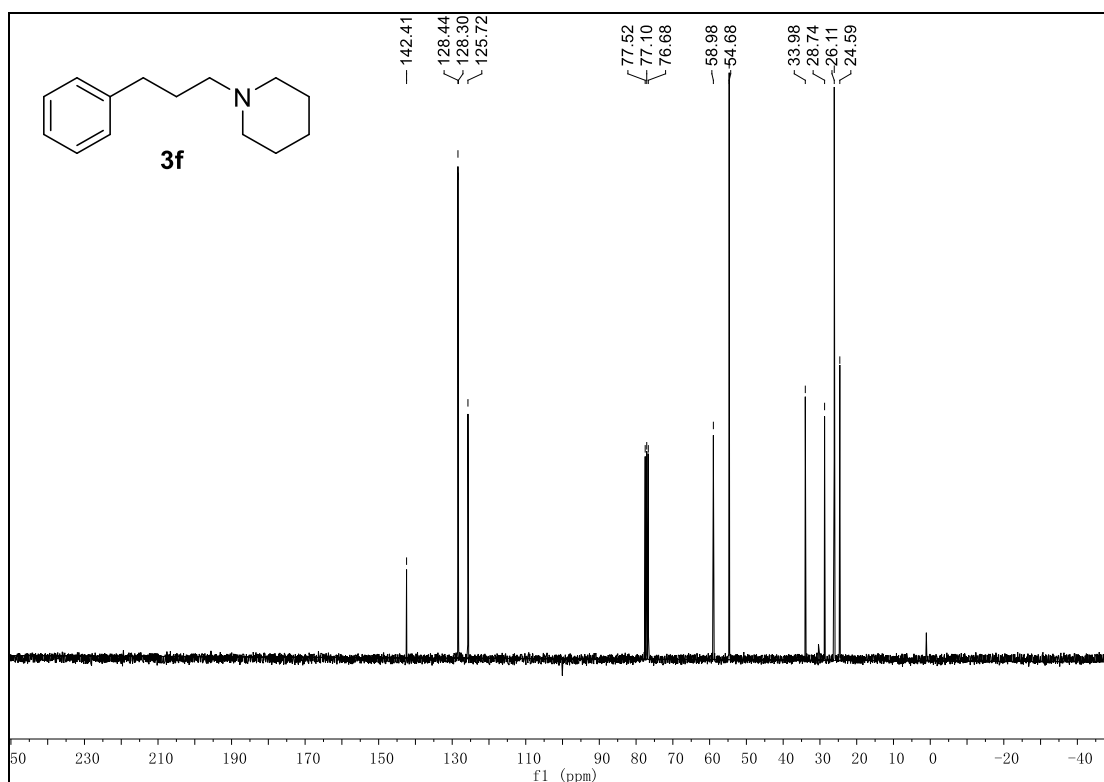

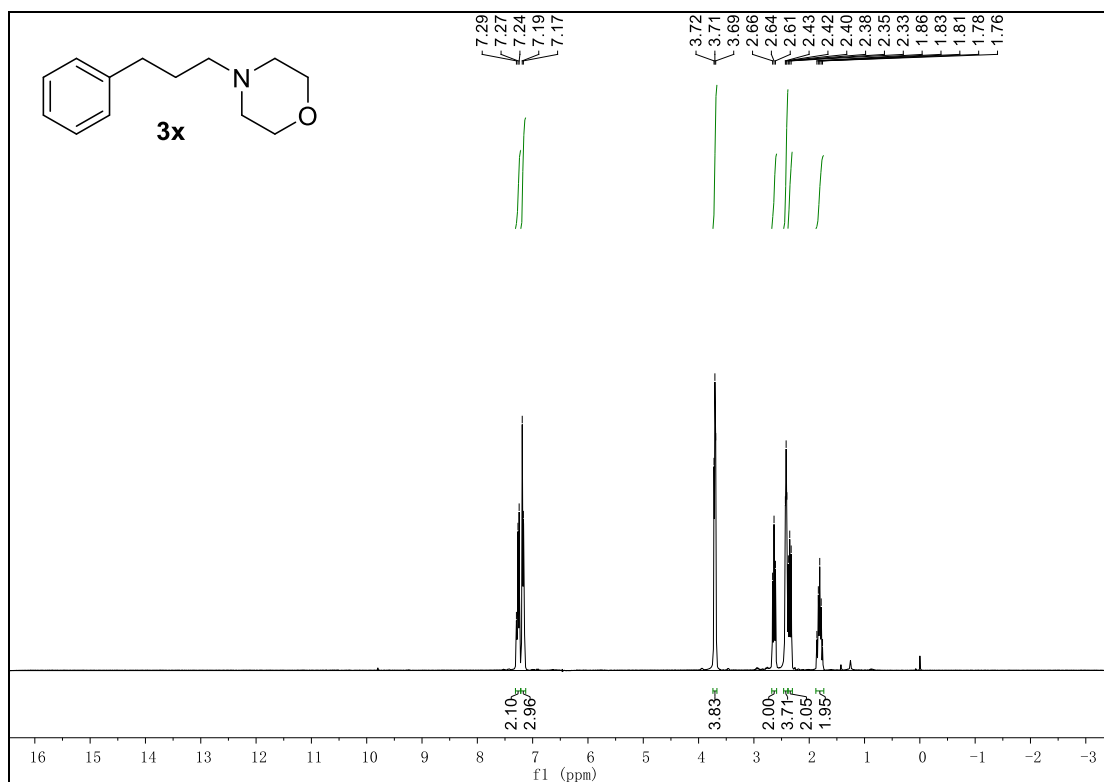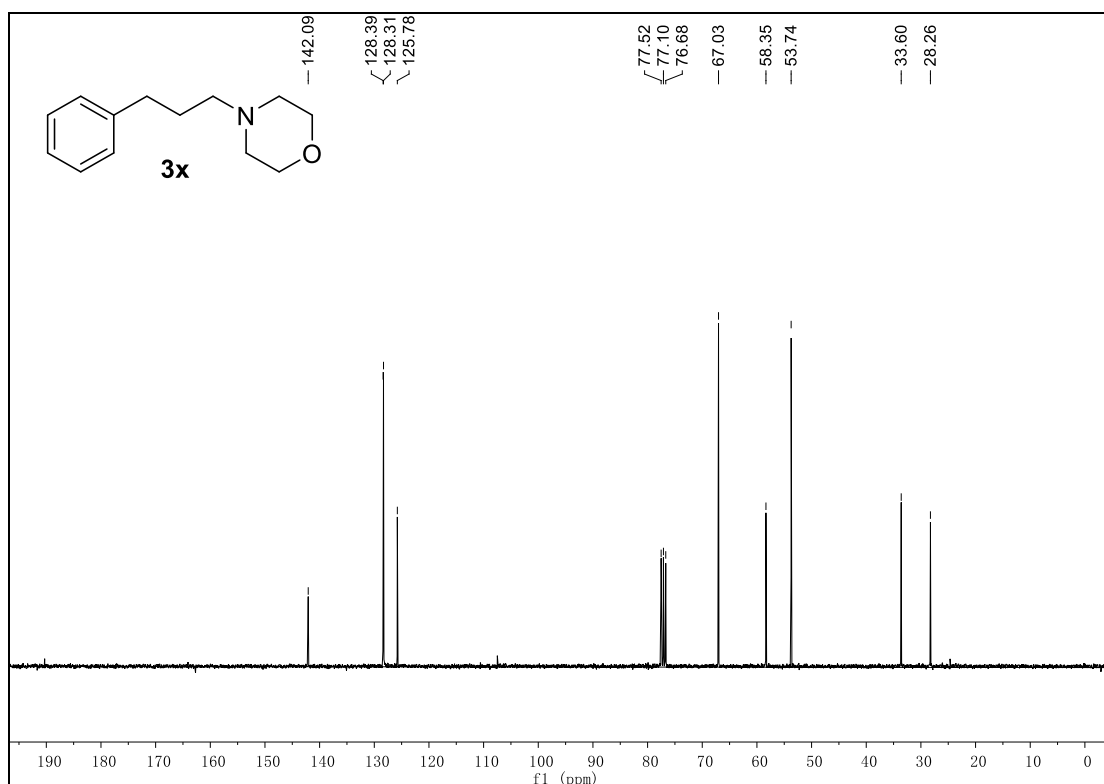

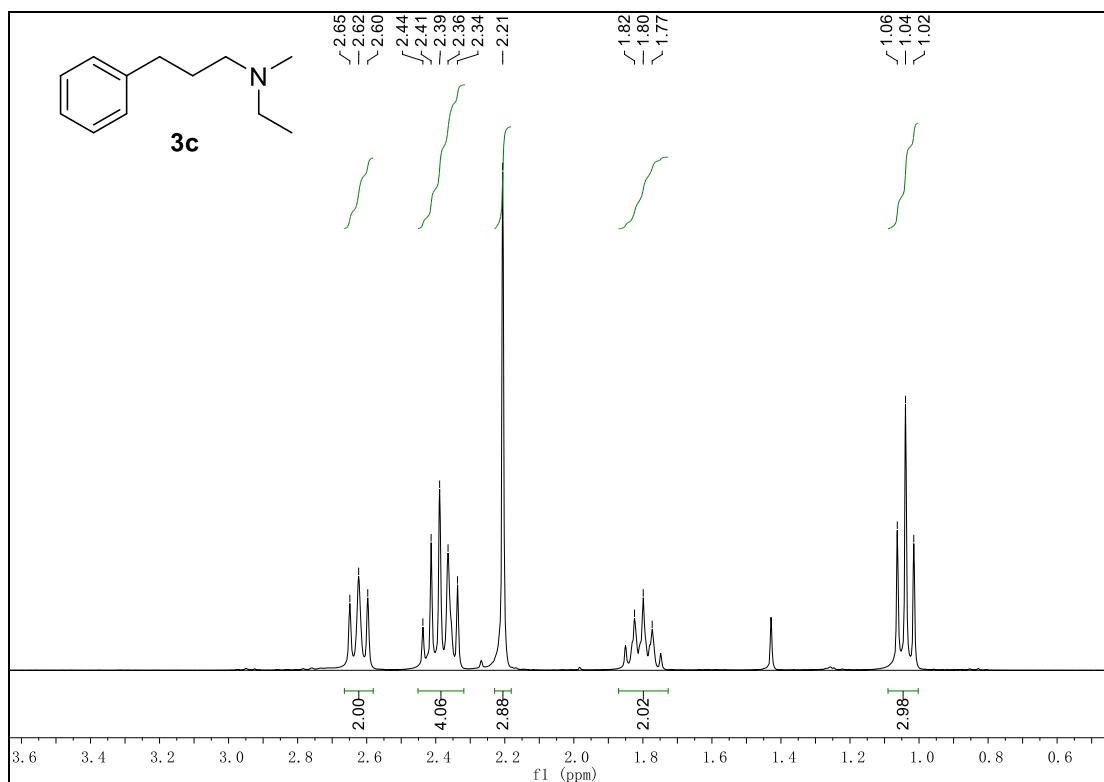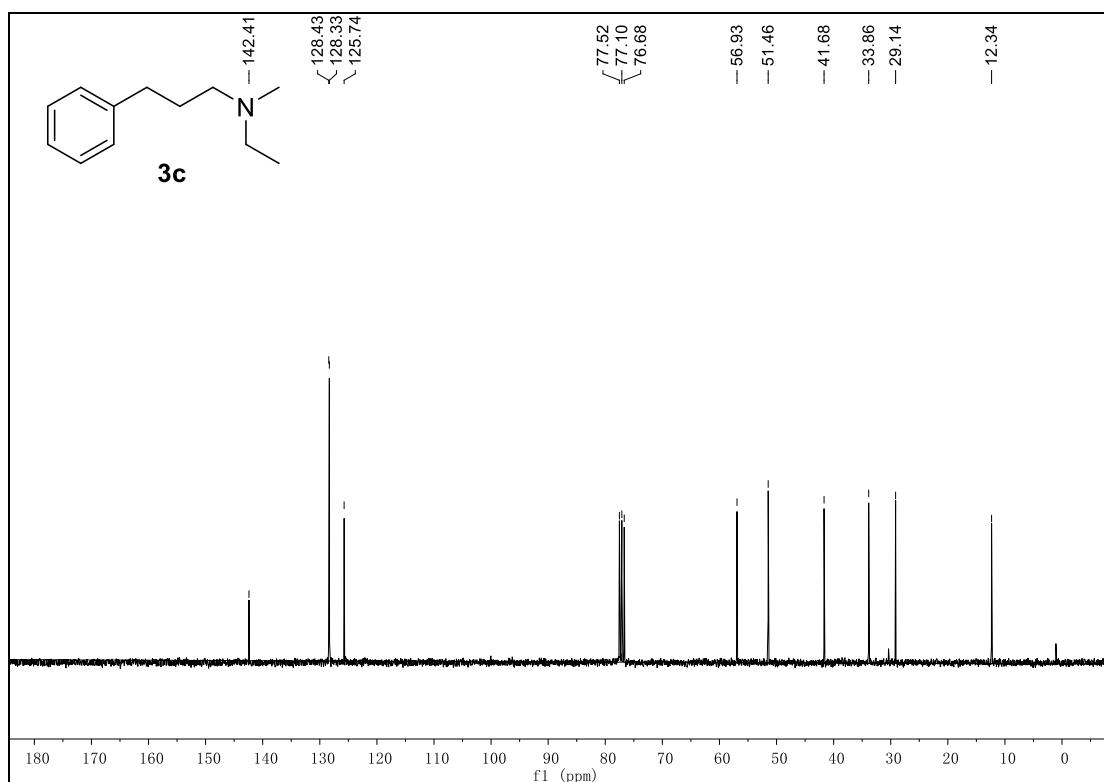

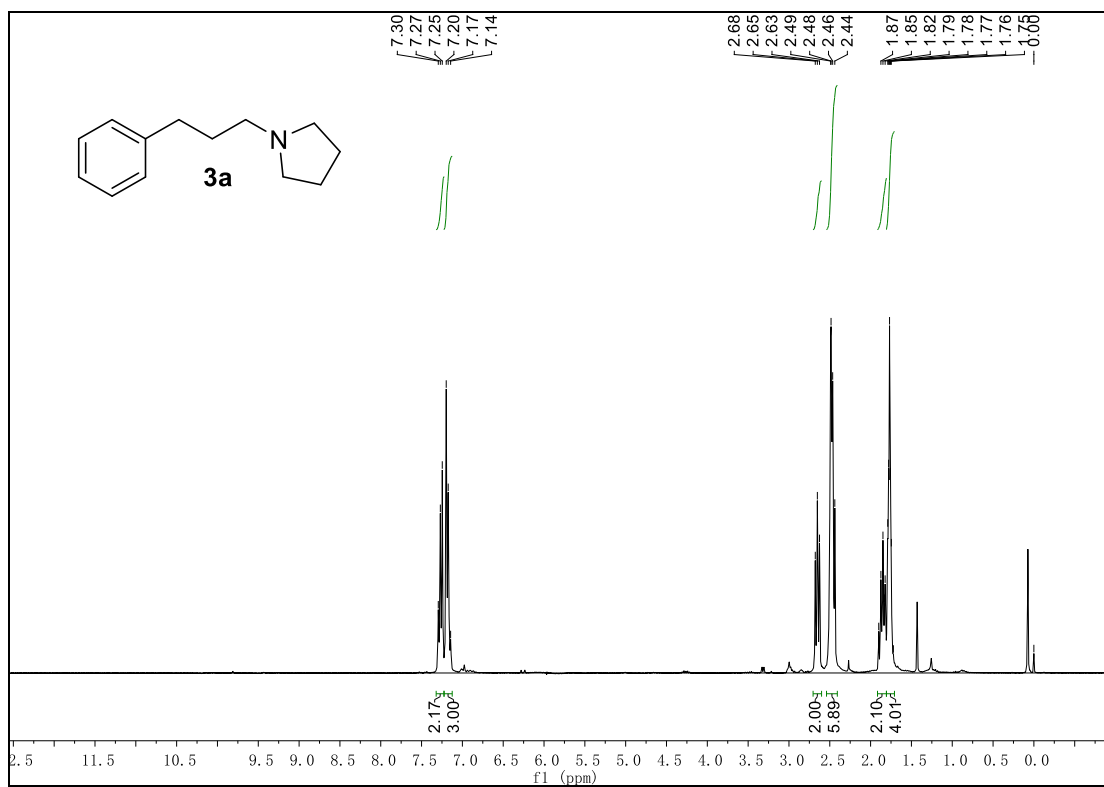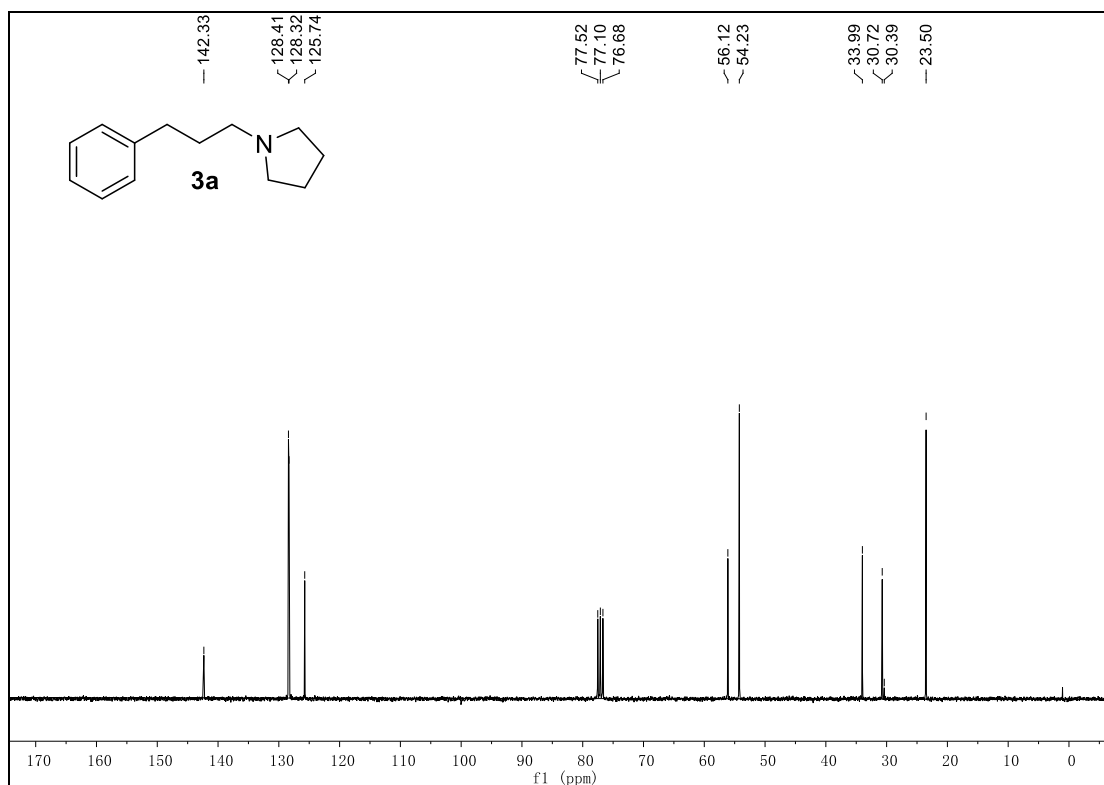



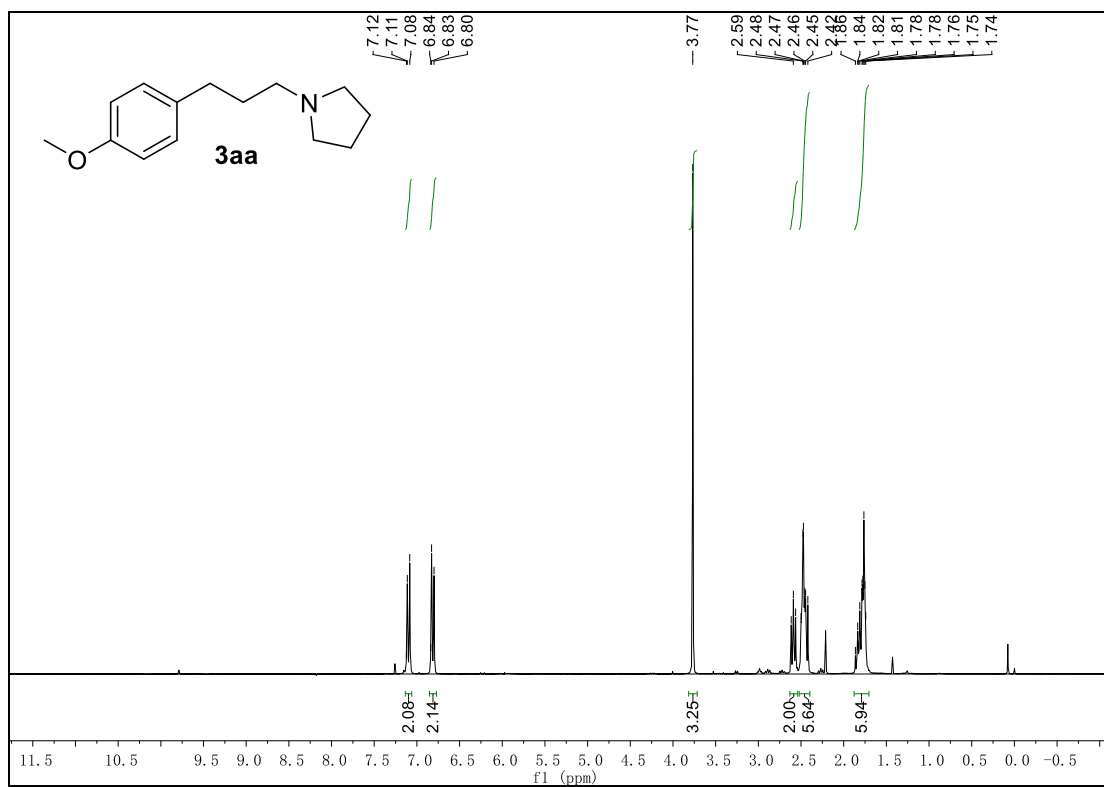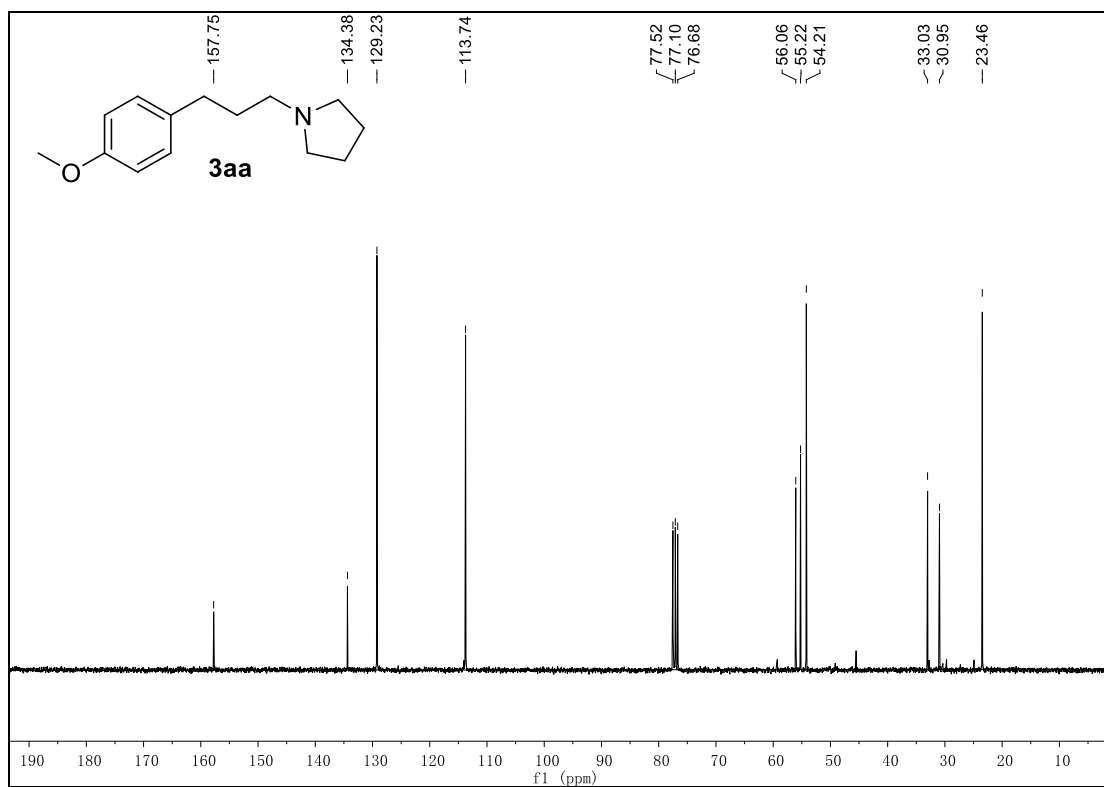

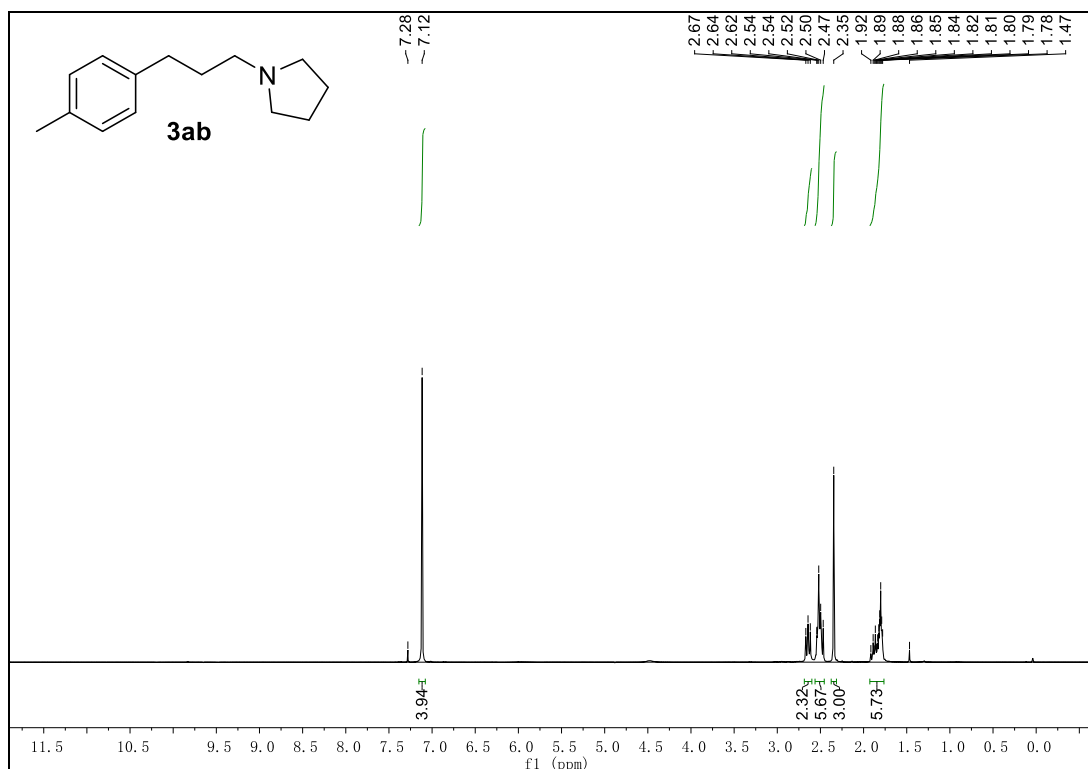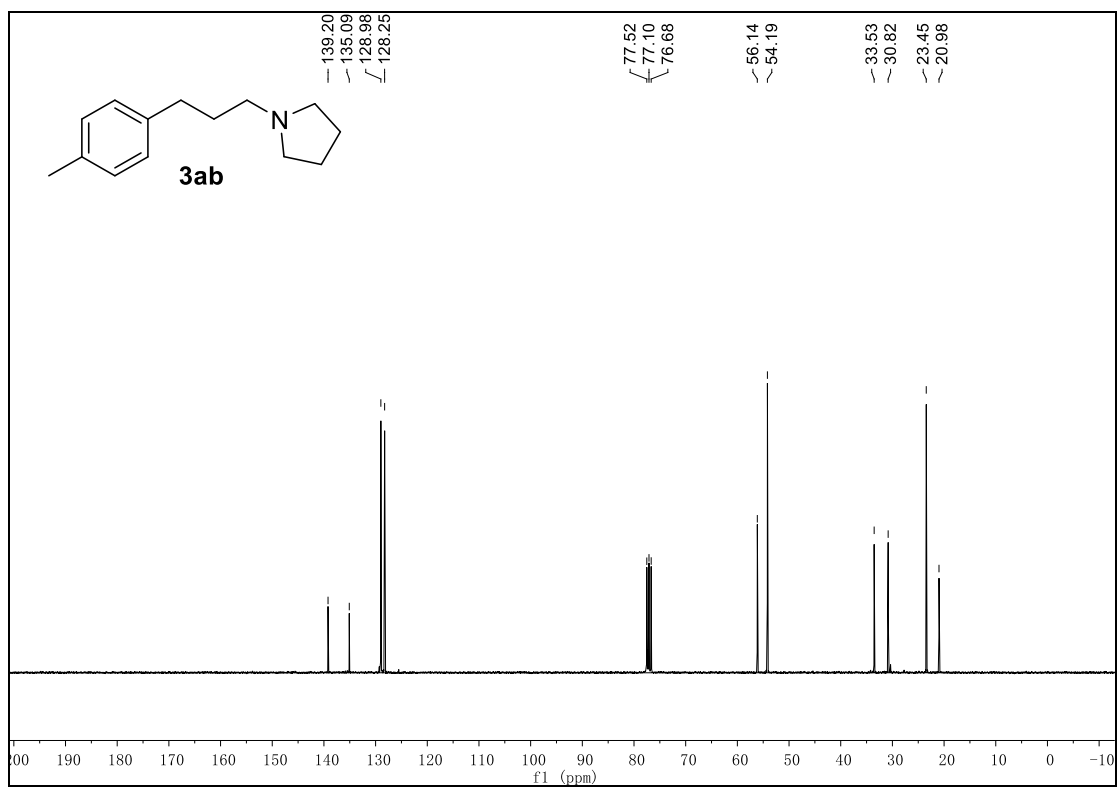

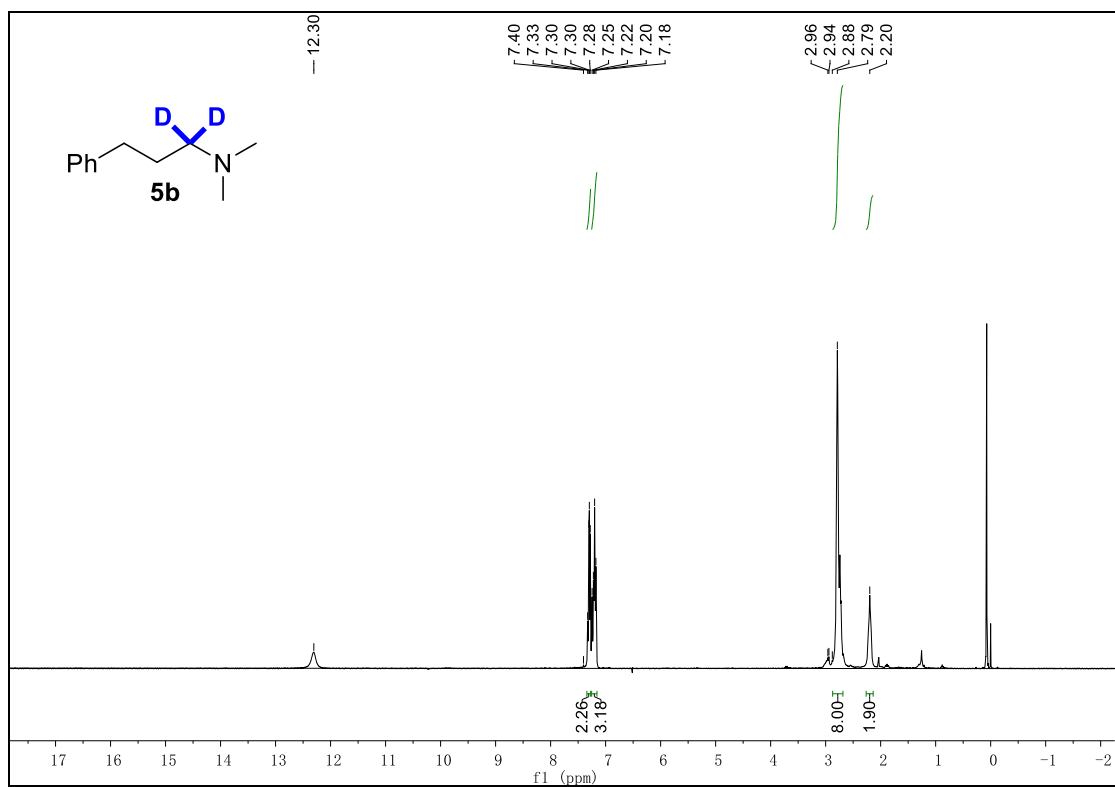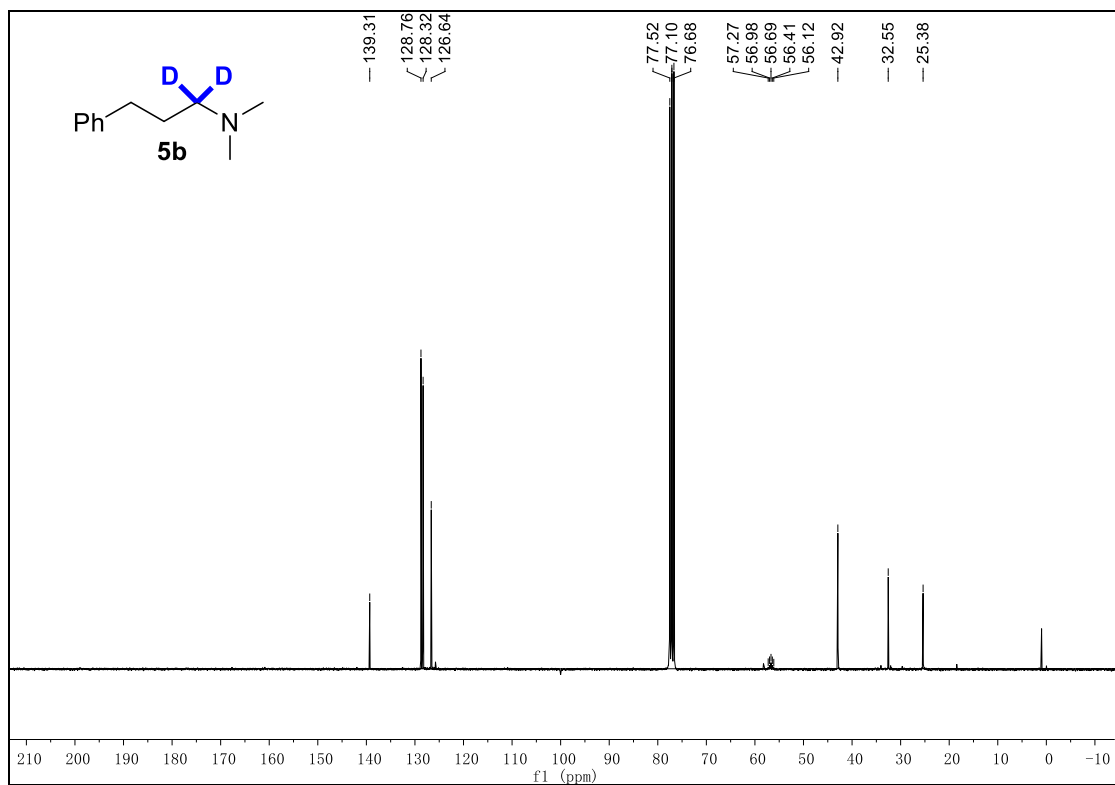

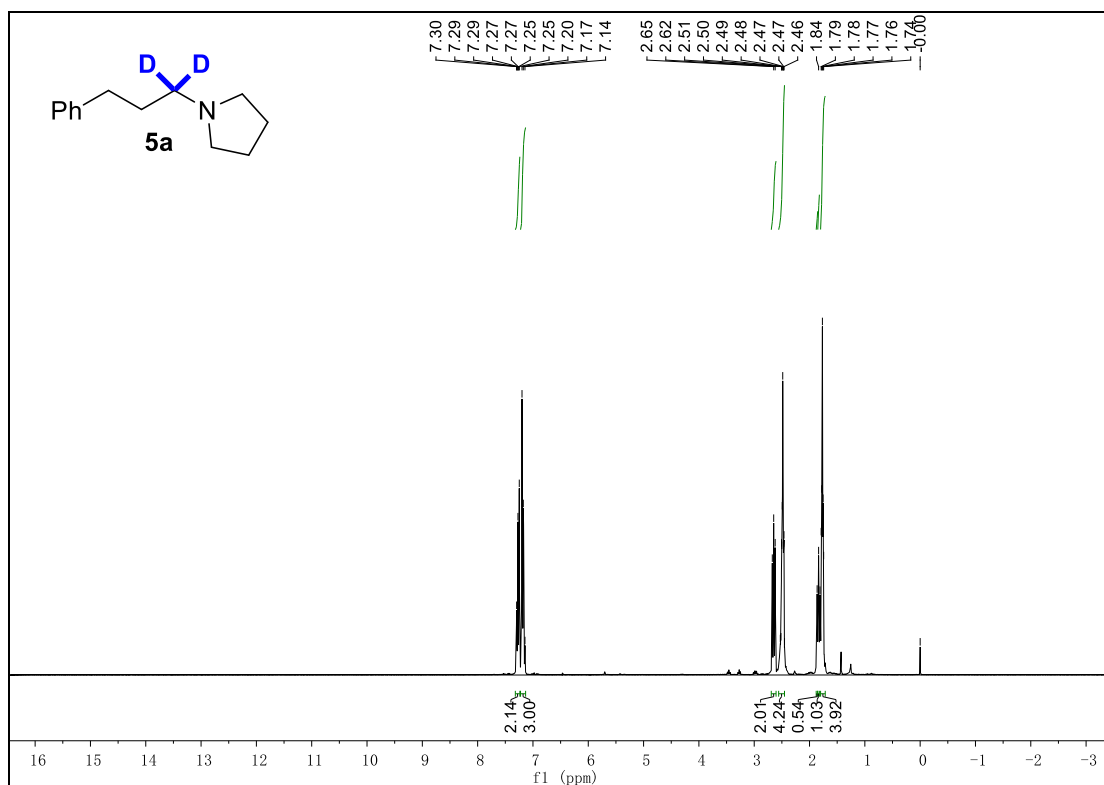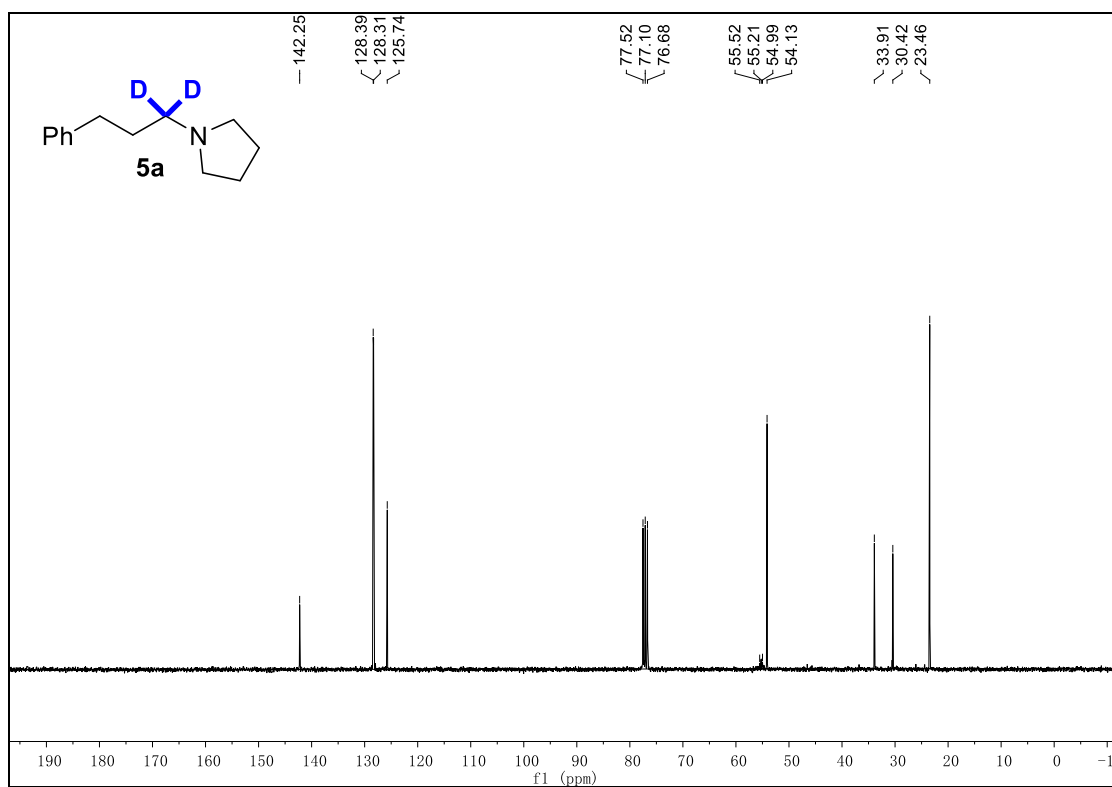

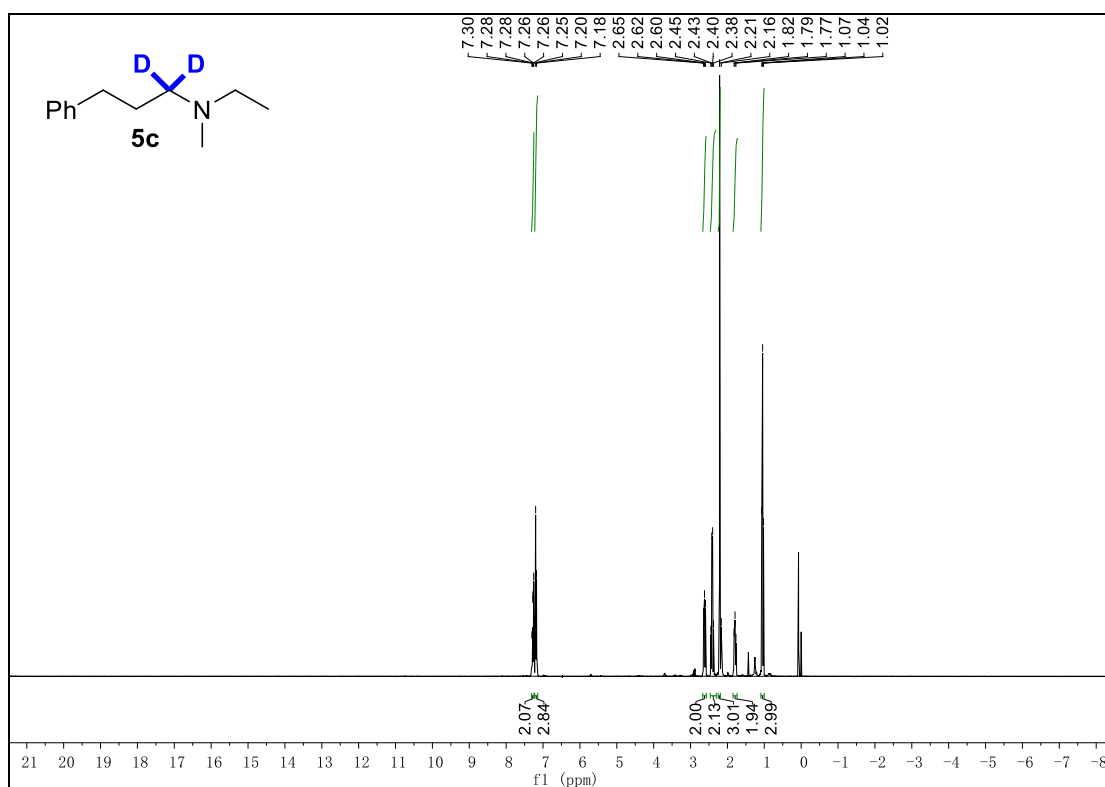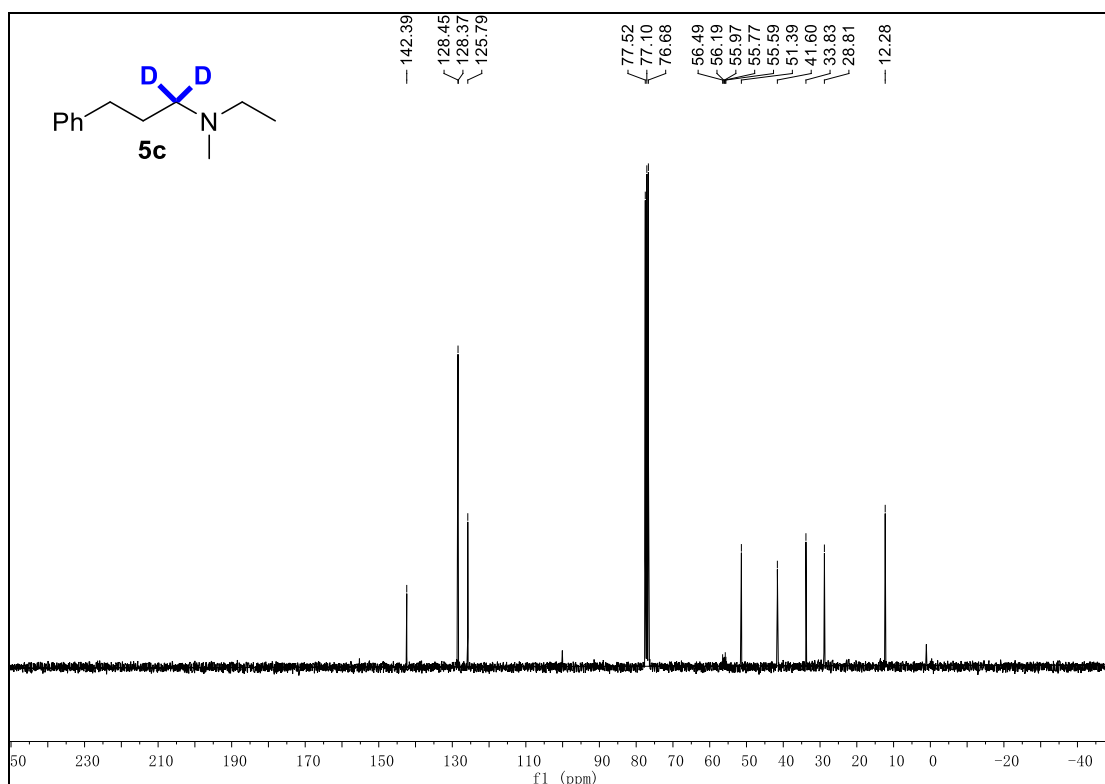

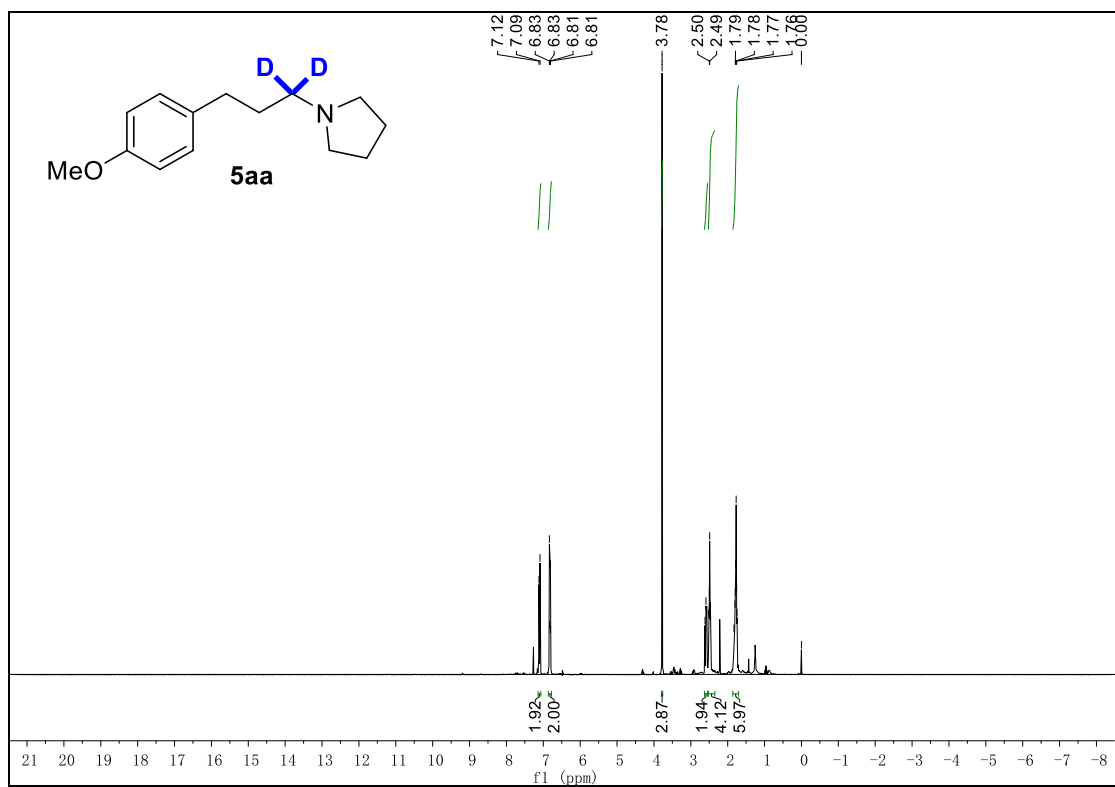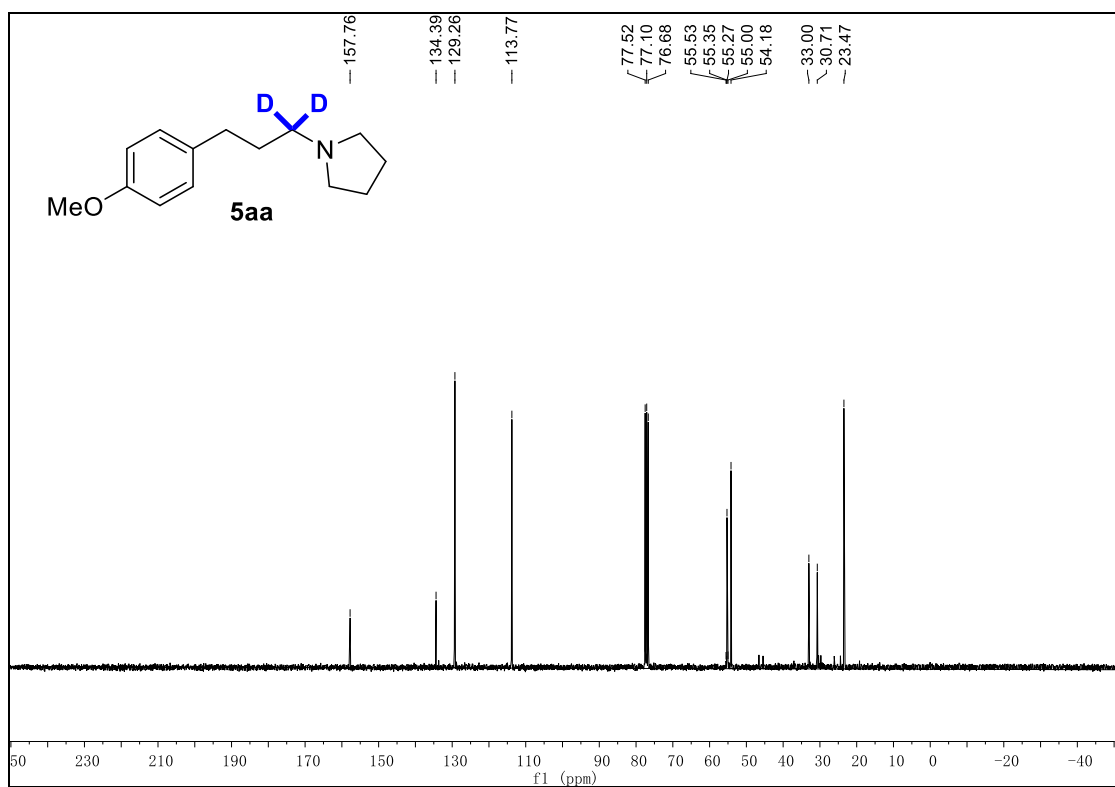

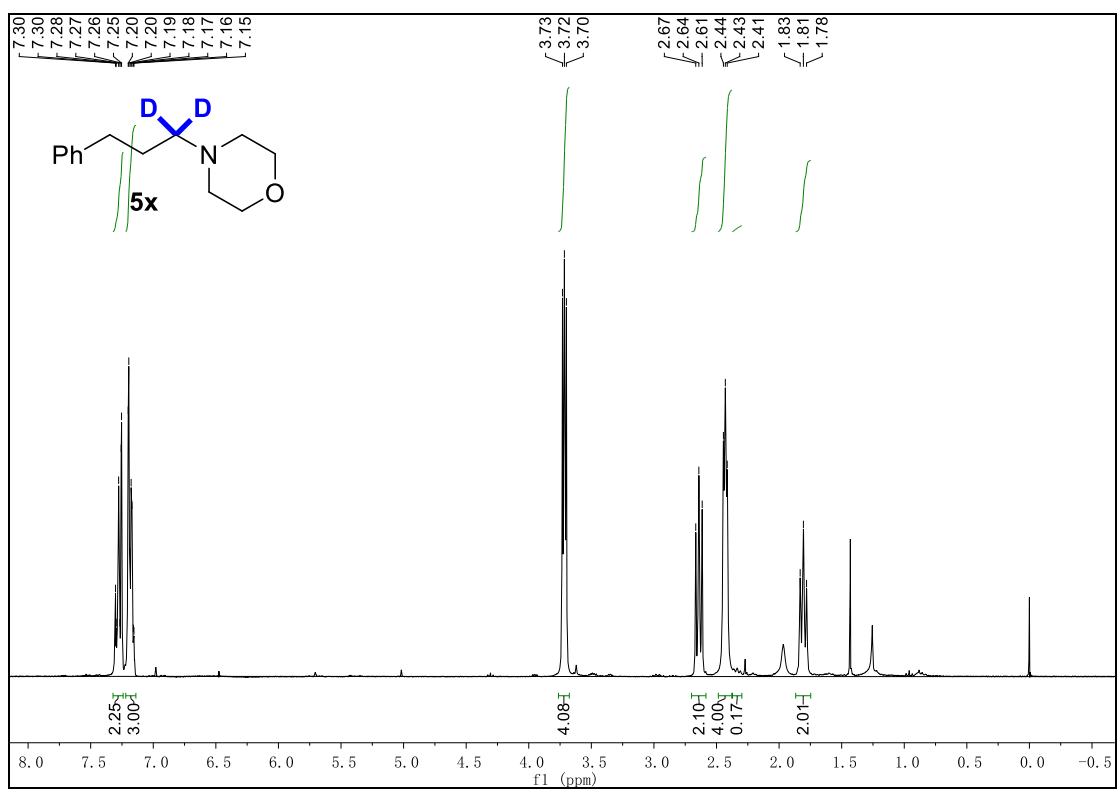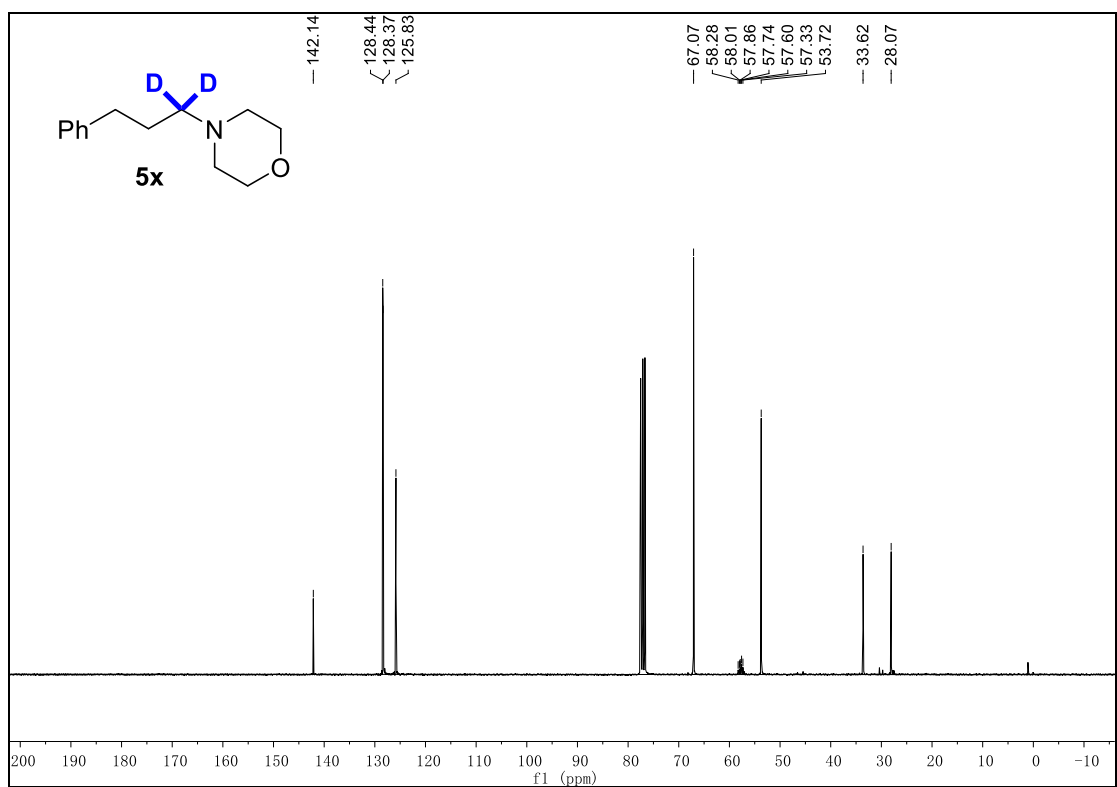

### Photos of Sodium Dispersions and Reaction

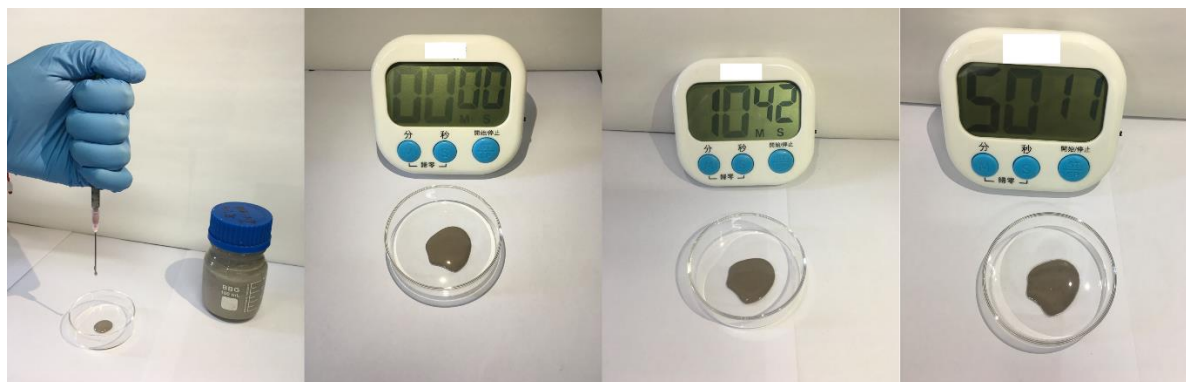

Figure S1. Sodium dispersions in oil (particle size 5-10  $\mu\text{m}$ ) was transferred into a glassware via syringe and kept in an open atmosphere for 50 min.

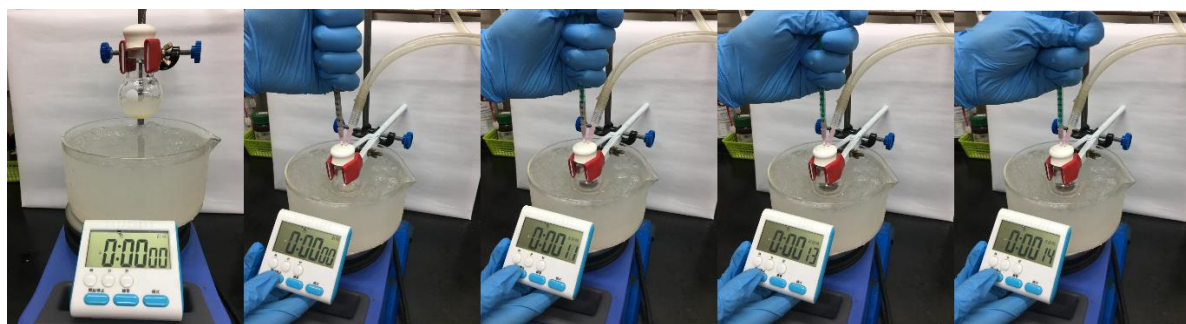

Figure S2. The reduction of **3a** using Na/NaOH/H<sub>2</sub>O (1.5 mmol scale)
